1 **Transient non-specific DNA binding dominates the target search of bacterial DNA-binding**  
2 **proteins**

3

4 Mathew Stracy\*<sup>a</sup>, Jakob Schweizer<sup>b</sup>, David J Sherratt<sup>a</sup>, Achillefs N Kapanidis<sup>c</sup>, Stephan Uphoff\*<sup>a</sup>,  
5 Christian Lesterlin\*<sup>d</sup>

6 <sup>a</sup>Department of Biochemistry, University of Oxford, Oxford OX1 3QU, United Kingdom

7 <sup>b</sup>Max Planck Institute for Dynamics of Complex Technical Systems, Magdeburg

8 <sup>c</sup>Biological Physics Research Group, Clarendon Laboratory, Department of Physics, University of  
9 Oxford, Oxford OX1 3PU, United Kingdom

10 <sup>d</sup>Molecular Microbiology and Structural Biochemistry (MMSB), Université Lyon 1, CNRS, Inserm,  
11 UMR5086, 69007, Lyon, France

12

13 \*Correspondence to: [mathew.stracy@bioch.ox.ac.uk](mailto:mathew.stracy@bioch.ox.ac.uk); [stephan.uphoff@bioch.ox.ac.uk](mailto:stephan.uphoff@bioch.ox.ac.uk)

14 [christian.lesterlin@ibcp.fr](mailto:christian.lesterlin@ibcp.fr)

15 **ABSTRACT**

16 **Despite their diverse biochemical characteristics and functions, all DNA-binding proteins share**  
17 **the ability to accurately locate their target sites among the vast excess of non-target DNA.**  
18 **Towards identifying universal mechanisms of the target search, we used single-molecule tracking**  
19 **of 11 diverse DNA-binding proteins in living *Escherichia coli*. The mobility of these proteins**  
20 **during the target search was dictated by DNA interactions, rather than by their molecular**  
21 **weights. By generating cells devoid of all chromosomal DNA, we discovered that the nucleoid does**  
22 **not pose a physical barrier for protein diffusion, but significantly slows the motion of DNA-**  
23 **binding proteins through frequent short-lived DNA interactions. The representative DNA-**  
24 **binding proteins (irrespective of their size, concentration, or function) spend the majority (58-**  
25 **99%) of their search time bound to DNA and occupy as much as ~30% of the chromosomal DNA**  
26 **at any time. Chromosome-crowding likely has important implications for the function of all DNA-**  
27 **binding proteins.**

28

## 29 INTRODUCTION

30 DNA is organized into chromosomes that must be maintained in a highly compacted state, while  
31 keeping the genetic information accessible for processing by many DNA-binding proteins. The ability  
32 of these proteins to identify and bind to specific DNA target sites among the vast excess of non-target  
33 DNA is crucial to fundamental cellular functions, including the recruitment of transcription factors to  
34 promoter sequences, of DNA repair proteins to DNA lesions, or of DNA topoisomerases to supercoiled  
35 DNA strands, to name just a few. In all organisms, diffusion is the primary mechanism by which DNA-  
36 binding proteins locate their target sites on chromosomes (Erbaş and Marko, 2019; Erbaş et al., 2019;  
37 Schavemaker et al., 2018). The diffusion coefficient of a particle in a dilute solution is determined by  
38 its size, as well as the viscosity and temperature of the medium. Within the crowded and heterogeneous  
39 intracellular environment, however, a myriad of specific and non-specific interactions as well as steric  
40 effects influence the mobility of macromolecules. Because of this complexity, efforts to understand  
41 molecular mobility have relied on phenomenological models (Kalwarczyk et al., 2012; Mika and  
42 Poolman, 2011) or coarse-grained simulations of the cytoplasm (Chow and Skolnick, 2017; Feig et al.,  
43 2015; Hasnain et al., 2014). In this context, analysis of *in vivo* experimental data is crucial not only to  
44 determine parameter values but also the structure of such models by informing which cellular  
45 components and interactions should be included in a model.

46  
47 Contrary to eukaryotes, bacterial chromosomes are not compartmentalized into a nucleus, but organized  
48 into nucleoid structures without a physical barrier from the cytoplasm. The 4.6 Mbp *E. coli* chromosome  
49 with a contour length of 1.6 mm is compacted into a volume of  $\sim 1 \mu\text{m}^3$  via DNA supercoiling, entropic  
50 forces, as well as protein-DNA and RNA-DNA interactions, and occupies  $\sim 60\%$  of the bacterial cell  
51 volume (Gray et al., 2019). Outside the nucleoid, the cytoplasm is mainly comprised of RNA and  
52 proteins. A longstanding question is whether the presence of the dense nucleoid mesh affects the  
53 mobility of all cytoplasmic proteins, regardless of their ability to bind DNA. The chromosome could  
54 pose a steric barrier, resulting in confined diffusion, and preventing larger proteins from accessing the  
55 densest regions of the nucleoid (Kalwarczyk et al., 2012; Konopka et al., 2006; Kuznetsova et al., 2014).  
56 Furthermore, the target-search process is subject to a trade-off between speed and accuracy to  
57 distinguish target from non-target sites (Zandarashvili et al., 2015). Accumulating experimental  
58 evidence supports theoretical considerations that the search efficiency is maximized by “facilitated  
59 diffusion”, which is the combination of 3D protein diffusion with non-specific binding and 1D sliding  
60 along DNA (Halford and Marko, 2004; Hammar et al., 2012; Hippel and Berg, 1989). Together with  
61 chromosome crowding effects, the relative contribution of 3D and 1D diffusion modes during the target  
62 search should strongly affect the overall mobility of DNA-binding proteins *in vivo*.

63

64 Fluorescence microscopy-based methods such as Fluorescence Correlation Spectroscopy (FCS) (Bacia  
65 et al., 2006; Cluzel et al., 2000) and Fluorescence Recovery After Photobleaching (FRAP) (Konopka  
66 et al., 2006; Kumar et al., 2010; Mika and Poolman, 2011; Mika et al., 2010; Mullineaux et al., 2006;  
67 Nenninger et al., 2010; Ramadurai et al., 2009) have been used to investigate protein mobility in live  
68 bacterial cells. More recently, it has become possible to directly visualize aspects of the target search  
69 of individual proteins in live cells using single-molecule microscopy (Elf et al., 2007; Hammar et al.,  
70 2012; Kapanidis et al., 2018; Normanno et al., 2015; Rhodes et al., 2017). These studies focused on a  
71 limited number of test proteins, typically the Lac repressor or other transcription factors, raising the  
72 question whether the proposed models for the target search are universal for diverse types of DNA-  
73 binding proteins. Although the observed intracellular mobility and spatial distribution of DNA-binding  
74 proteins suggest that non-specific DNA interactions play an important role in their target search  
75 kinetics, these interactions appeared too transient for direct visualization and quantification by live-cell  
76 imaging (Garza de Leon et al., 2017; Stracy et al., 2015, 2016; Uphoff et al., 2013). In previous attempts  
77 to resolve this issue, the DNA-binding affinity of the protein studied was perturbed genetically (Elf et  
78 al., 2007), but for some proteins this approach is not readily tractable. Alternatively, protein mobility  
79 has been compared between different regions of the cell with lower or higher DNA density (Bakshi et  
80 al., 2011; Sanamrad et al., 2014; Stracy et al., 2015). However, since few DNA-binding proteins are  
81 located in DNA-free regions of the cell, it is difficult to accurately measure their diffusion with this  
82 approach. Furthermore, even with super-resolution microscopy, the exact shape and boundary of the  
83 nucleoid are not well defined (Le Gall et al., 2017; Stracy et al., 2015).

84

85 To overcome this uncertainty and to determine the influence of the nucleoid DNA on protein mobility,  
86 we measured the mobility of DNA-binding proteins in cells devoid of chromosomal DNA. To this end,  
87 we developed a method to remove all chromosomal DNA from cells. By comparing protein diffusion  
88 in DNA-free cells and unperturbed cells, we identified universal features of the target search process  
89 for 11 DNA-binding proteins with a broad range of sizes, biochemical characteristics and functions.  
90 This, combined with diffusion simulations, allowed us to quantitatively partition the behavior of diverse  
91 DNA-binding proteins into long-lived DNA-binding at target sites, transient non-specific DNA-  
92 binding, and free diffusion between DNA strands. We found that the intracellular mobility of proteins  
93 during their target search is primarily dictated by transient interactions with the DNA, rather than by  
94 their molecular weight or intracellular concentration. The representative DNA-binding proteins  
95 (irrespective of their size, concentration, or function) spend the majority (58-99%) of their search time  
96 bound to DNA, occupying as much as ~30% of the chromosomal DNA at any time.

97

98 **RESULTS**

## 99 **Live-cell single-molecule tracking of a variety of DNA-binding proteins**

100 To uncover universal mechanisms that govern the target search process of DNA-binding proteins in  
101 general, we measured the diffusion characteristics of 11 different proteins involved in various types of  
102 DNA transactions and spanning a large range of molecular weights and concentrations inside the cell.  
103 These included proteins whose target is a specific DNA sequence such as RNA polymerase ( $\beta'$  subunit,  
104 RpoC), the low copy number transcription factor LacI, and the abundant histone-like nucleoid-  
105 associated proteins HU and H-NS. We further analyzed proteins which target DNA structural motifs  
106 such as DNA topoisomerases (ParC, GyrA) which act on supercoiled DNA, or DNA polymerase I  
107 (PolI) and DNA ligase (LigA) which recognize gapped or nicked DNA respectively. Lastly, we also  
108 studied DNA-repair proteins which recognize DNA lesions (UvrA) or mismatches (MutS), and the  
109 Structural Maintenance of Chromosomes (SMC) protein MukB which is involved in chromosome  
110 organization but binds DNA with little known specificity.

111  
112 To examine the mobility of this diverse set of proteins, we use single-molecule tracking, a method that  
113 provides a direct readout of protein mobility inside living cells (Gahlmann and Moerner, 2014; Li et  
114 al., 2018; Uphoff and Sherratt, 2017). We imaged proteins that were fused to the photoactivatable  
115 fluorescent protein PAmCherry (Subach et al., 2009), and expressed from their endogenous  
116 chromosome locus in *Escherichia coli* cells. The use of a photoactivatable fluorophore allows tracking  
117 proteins at their native expression levels by imaging single molecules, one at a time, while the rest of  
118 the molecules reside in a non-fluorescent state (Bakshi et al., 2011; English et al., 2011; Manley et al.,  
119 2008; Niu and Yu, 2008; Uphoff et al., 2013). We recorded movies on a custom-built microscope using  
120 near-Total Internal Reflection Illumination (Tokunaga et al., 2008; Wegel et al., 2016) with sparse  
121 photoactivation at a frame rate of 15 ms/frame for >5000 frames to resolve the motion of hundreds of  
122 molecules per cell in multiple cells per field of view. Following automated localization and particle  
123 tracking analysis, the apparent diffusion coefficient  $D^*$  was calculated from the mean-squared  
124 displacement (MSD) of each trajectory (Uphoff, 2016) (Fig. 1A).

125  
126 Computing  $D^*$  from particle-tracking data tends to underestimate the actual diffusion coefficient  $D$  for  
127 molecules with high mobility because of measurement biases, including the blurring of fluorescent  
128 spots due to molecular motion during the camera exposure and the confinement of trajectories within  
129 the cell volume (Uphoff, 2016). Hence, we initially analyzed apparent diffusion coefficients and  
130 subsequently employed diffusion simulations to correct the biases (see below). Molecular  
131 subpopulations that differ in mobility can be detected as separate species in  $D^*$  distributions. In  
132 particular, proteins that remain bound to DNA over the entire trajectory appear essentially immobile  
133 due to the slow and constrained motion of chromosomal DNA (Elmore et al., 2005).

134

135 **The mobility of DNA-binding proteins is independent to their molecular weights.**

136 The average intracellular mobility of the different DNA-binding proteins varied strongly, ranging from  
137 mostly immobile proteins such as HNS (mean  $D^* = 0.17 \mu\text{m}^2/\text{s}$ ) to mostly diffusing proteins such as  
138 LigA (mean  $D^* = 1.14 \mu\text{m}^2/\text{s}$ ) (Fig. 1B). There was no obvious relation between the observed mobility  
139 and the type of DNA interactions (e.g. sequence-specific, structure-specific, or lesion binding). To  
140 distinguish between proteins specifically bound to DNA and mobile proteins searching for target sites  
141 we first determined the apparent mobility of proteins specifically bound to DNA by measuring the  
142 motion of PolI molecules recruited to DNA damage sites generated by treating cells with the DNA-  
143 alkylating agent methyl methanesulfonate (MMS, 100 mM) (Fig. S1A), which resulted in an increase  
144 in molecules which are immobile (with  $D_{\text{imm}}^* = 0.11 \mu\text{m}^2/\text{s}$ ) for the entire trajectory (5 frames, 75 ms),  
145 as previously observed (Uphoff et al., 2013). For other proteins in this study we have previously  
146 observed a similar increase in ‘long-lived’ immobile molecules ( $D_{\text{imm}}^* = 0.11 \mu\text{m}^2/\text{s}$ ) upon recruitment  
147 to specific target sites after induction of DNA damage (LigA, UvrA, MutS; Stracy et al., 2016; Uphoff  
148 et al., 2013, 2016), or by capturing DNA-bound enzymes during catalysis by drug treatment (GyrA,  
149 ParC; Stracy et al., 2019; Zawadzki et al., 2015). We previously observed a decrease in the long-lived  
150 immobile population of RNAP upon addition of a transcription-inhibiting drug (Stracy et al., 2015),  
151 and a similar decrease for LacI after removing its chromosomal binding site (Garza de Leon et al.,  
152 2017). Together, these studies show that the long-lived immobile population represents proteins  
153 specifically bound at DNA target sites. The apparent mobility of these DNA-bound molecules was  
154 slightly above the localization uncertainty of  $\sigma = 35 \text{ nm}$  measured in chemically fixed cells (giving an  
155 apparent  $D_{\text{fixed}}^* = 0.07 \mu\text{m}^2/\text{s}$ ; Fig. S1B). By subtracting the contribution of the localization uncertainty  
156 to the observed  $D^*$  (Michalet and Berglund, 2012), we estimate the mobility of proteins bound to DNA  
157 loci for the entire trajectory as  $D_{\text{bound}}^* = 0.04 \mu\text{m}^2/\text{s}$ .

158

159 To determine the relative abundances and average diffusion coefficients of mobile molecules searching  
160 for target sites and long-lived immobile molecules bound to DNA, we fitted the  $D^*$  histograms using  
161 an analytical function derived from a two-species Brownian motion model (Stracy et al., 2015) (Fig.  
162 1B and S1A-B). The quantification confirmed our initial observations that the different DNA-binding  
163 proteins exhibit vastly different mobility inside cells, both in terms of the fraction of mobile and  
164 immobile molecules (ranging from 96 % of mobile for PolI to 23 % mobile for H-NS molecules) (Fig.  
165 1C), and in terms of the diffusion coefficients of the mobile molecules (ranging from  $0.33 \mu\text{m}^2/\text{s}$  for  
166 HU to  $1.2 \mu\text{m}^2/\text{s}$  for LigA) (Fig. 1D).

167

168 According to the Stokes-Einstein equation for Brownian motion, the diffusion coefficient of a spherical  
169 particle is related to its mass:  $D \sim M^{-1/3}$ . To test this relation for the DNA-binding proteins, we plotted  
170  $D^*$  of molecules in the mobile state against the known molecular weights of each protein (Fig. 1E).  
171 Strikingly, the *in vivo* mobility of DNA-binding proteins was largely independent of their mass.  
172 Although non-spherical proteins are expected to deviate from the Stokes-Einstein law, this does not

173 explain the absence of any correlation between mass and mobility. In contrast, previous studies showed  
174 a clear dependence of mass on the mobility of cytoplasmic proteins with no affinity for DNA  
175 (Kalwarczyk et al., 2012; Kumar et al., 2010; Nenninger et al., 2010). Our results indicate that the  
176 apparent mobility of DNA-binding proteins is dictated by molecular interactions independent of protein  
177 mass. There was also no trend between the mobility and the intracellular concentration of the different  
178 proteins (Fig. S1C).

179

### 180 **DNA-binding proteins remain closely associated with the nucleoid during their target search.**

181 We examined the spatial distribution of mobile DNA-binding proteins relative to the nucleoid. As an  
182 example, we tracked PolI-PAmCherry and RNAP-PAMCherry in live cells that were stained with  
183 SytoGreen dye to label DNA (Fig. 2A-B). The spatial distributions of mobile molecules closely  
184 overlapped with the nucleoid. Similarly, when averaged over many cells and the intracellular position  
185 of the mobile population of molecules clearly demarcates the nucleoid shape (Fig. 2D). This was in  
186 contrast to ribosomal protein S1, which has no direct DNA affinity. Consistent with previous reports  
187 (Sanamrad et al., 2014), the slow-moving S1 molecules, which are presumably incorporated into  
188 ribosomes, resided outside the nucleoid area, whereas the mobile unincorporated subunits are uniformly  
189 distributed throughout the cell (Fig. 2C-D). We hypothesized that the enrichment of mobile DNA-  
190 binding proteins within the nucleoid is caused by transient interactions with DNA during the target  
191 search process. The computation of  $D^*$  values is based on the average movement of a molecule over a  
192 series of frames (here 5 frames, 75 ms). The observed mobility thus reflects a time-average of the  
193 diffusion coefficient where 3D diffusion is interrupted by multiple transient binding events with a  
194 duration below 75 ms. Consistent with this view, we observed that the mobility of DNA-binding  
195 proteins increased and tracks spread throughout the cell cytoplasm after treatment with the antibiotic  
196 rifampicin, which causes decompaction of the nucleoid (Fig. S1D) (Cabrera et al., 2009; Dworsky and  
197 Schaechter, 1973; Stracy et al., 2015).

198

### 199 **Generating chromosome-free cells to study protein diffusion in the absence of DNA**

200 The association of mobile DNA-binding proteins with the nucleoid could reflect a genuine DNA-  
201 binding activity or be the result of a sieving effect where protein movement is slowed within the  
202 nucleoid by physical entrapment within the mesh of DNA strands. To distinguish between the effects  
203 of sieving and non-specific DNA interactions, we devised a method that eliminates protein-DNA  
204 interactions entirely by removing all chromosomal DNA from cells, while retaining the same cell size  
205 and intracellular protein concentration. To this end, we used the I-SceI restriction endonuclease from  
206 *Saccharomyces cerevisiae* (Monteilhet et al., 1990), which introduces site-specific double-stranded  
207 DNA breaks (DSBs) at *I-SceI* cut sites (*I-SceI*<sup>cs</sup>) inserted into the *E. coli* chromosome (Fig. 3A)

208 (Lesterlin et al., 2013; Meddows et al., 2004). In the absence of RecA, which is essential for  
209 homologous recombination, creation of DSBs by I-SceI results in complete degradation of the  
210 chromosome by the RecBCD helicase-nuclease complex, a phenomenon referred to as *reckless*  
211 chromosome degradation (Skarstad and Boye, 1993; Willetts and Clark, 1969). To minimize the time  
212 required for complete chromosome degradation, we inserted two cut sites diametrically opposed on the  
213 genetic map of the chromosome: in the *ilvA* locus (3953 kb) close to the origin of replication, and in the  
214 *ydeO* locus (1580 kb) in the *terminus* region (referred to as OT strain) (Fig. 3A). We then inactivated  
215 the *recA* gene by mutation in these strains carrying *Origin-Terminus* cut sites (referred to as OT*recA*-).  
216 Chromosome degradation was triggered by the expression of the plasmid-borne *I-SceI* gene under the  
217 control of an arabinose-inducible promoter. Chromosome degradation after *I-SceI* induction resulted in  
218 the progressive disappearance of DAPI-stained DNA from cells (Fig. 3B), which was complete within  
219 120 to 160 min in most (~92%) cells (Fig. 3C, Fig. S2A-B). This reflects the time required for 4  
220 RecBCD complexes to each degrade approximately one quarter of the chromosome (~1150 kb) from  
221 the 4 DNA ends generated by 2 DSBs at a speed of ~160 bp per second, consistent with previous results  
222 (Lesterlin et al., 2014). Before arabinose induction, a fraction of cells (~17%) already exhibited DNA  
223 degradation due to leaky I-SceI expression (Fig. S2A-B). We also found that a fraction (~8 %) of cells  
224 did not exhibit complete chromosome loss after 120 min (Fig. S2A-B), likely due to heterogeneous  
225 induction of I-SceI from the arabinose-inducible promoter in the cell population (Siegele and Hu, 1997)  
226 or because of the limiting number of RecBCD molecules per cell (Lepore et al., 2019). In the following,  
227 to ensure our results reflected completely chromosome-free cells, we excluded cells that showed any  
228 remaining fluorescent DNA stain from our analysis.

229

### 230 **Chromosome-free cells remain metabolically active for several hours**

231 Since protein mobility is influenced by the metabolic state of the cell (Parry et al., 2014), we explored  
232 if cells remained metabolically active after chromosome degradation using two independent assays.  
233 First, to test if ATP-driven mechanisms were affected by chromosome loss, we turned to the well-  
234 characterized ATP-dependent Min system, whose three components MinCDE are important for  
235 defining the position of the division site (Lutkenhaus, 2007). Coupled protein-protein and protein-  
236 membrane interactions generate pole-to-pole dynamic oscillation of MinC, which is highly sensitive to  
237 ATP concentrations (Hu et al., 2002). These oscillations are particularly striking in cells that have been  
238 grown into long filaments by treatment with the antibiotic cephalaxin (Raskin and de Boer, 1999). We  
239 found that the MinC-Ypet oscillation period was ~17 seconds with a wavelength of ~10  $\mu$ m, both in  
240 unperturbed cells and after chromosome degradation (Fig. 3D-G and Fig. S3), demonstrating that ATP  
241 concentration in chromosome-free cells remained stable for at least 2 hours. Our results also indicate  
242 that the presence of the nucleoid DNA has no influence on Min protein dynamics, in contrast to a



243 previous report that the oscillations may be coupled to chromosome segregation (Di Ventura et al.,  
244 2013).

245

246 Second, to test if protein synthesis activity was maintained after chromosome loss, we used a non-  
247 degraded plasmid producing a reporter protein ParB-mCherry from a  $P_{lac}$  promoter. We found that  
248 IPTG-induced ParB-mCherry production continued for ~200 min after I-SceI induction (Fig. S4A).  
249 Together, these tests establish that our chromosome degradation strategy is appropriate to study protein  
250 diffusion in metabolically active chromosome-free cells. Furthermore, in order to validate the use of  
251 this genetic system, we confirmed that protein diffusion was not affected by inactivation of RecA *per*  
252 *se*, or by induction of I-SceI in cells that do not contain any I-SceI cut sites, nor by DSB creation in  
253 RecA+ DNA repair-proficient cells (Fig S4B-C).

254

### 255 **The mobility of the Lac repressor increases in DNA-free cells.**

256 To test the effect of chromosome loss on intracellular diffusion, we first focused on the lac repressor  
257 (LacI) as a prototypical DNA-binding protein which searches for operator sequences by facilitated  
258 diffusion involving frequent non-specific DNA binding, rotation-coupled sliding and hopping (Elf et  
259 al., 2007; Garza de Leon et al., 2017; Hammar et al., 2012; Kao-Huang et al., 1977; Marklund et al.,  
260 2020). Chromosome degradation, ~120 min after I-SceI induction, drastically changed the diffusion  
261 behavior of LacI-PAmCherry (Fig. 4A). We no longer detected any immobile molecules; further, the  
262 mobility of the diffusing population increased significantly (from  $D^* = 0.43 \mu\text{m}^2/\text{s}$  in unperturbed cells  
263 to  $D^* = 1.5 \mu\text{m}^2/\text{s}$  in chromosome-free cells). The change in diffusion pattern is apparent in the  $D^*$   
264 distribution (Fig. 4A), MSD curves (Fig. 4B), and cumulative distributions of displacements (Fig. 4C).  
265 We identified a subpopulation of cells (~15 %) that exhibited no change in LacI diffusion after I-SceI  
266 induction; however, DNA staining prior to single-molecule tracking showed that these cells had no or  
267 incomplete chromosome loss and these cells were thus excluded (Fig. S5A-B). The strong influence of  
268 the presence of the chromosome on LacI mobility could be due to DNA-binding and sliding, or the  
269 result of a general molecular sieving effect, where protein motion is hindered because of entrapment  
270 within the chromosome meshwork. The latter effect should influence the motion of all proteins in the  
271 cell, even those that have no DNA affinity. To test this directly, we imaged a truncated LacI<sup>-41</sup> mutant  
272 with most of its DNA-binding domain (41 amino acids from the N-terminus) removed. For this mutant  
273 all specific and non-specific DNA binding modes are abolished (Elf et al., 2007; Garza de Leon et al.,  
274 2017), and hence shows essentially no immobile molecules (Fig. 4D). Notably, LacI<sup>-41</sup> also had a much  
275 higher apparent diffusion coefficient than the mobile population of wild-type LacI ( $D_{\text{lacI-41}}^* = 1.3 \mu\text{m}^2/\text{s}$   
276 vs  $D_{\text{lacI}}^* = 0.43 \mu\text{m}^2/\text{s}$ ). This difference far exceeded the 2–3% change expected solely from the 9 kDa  
277 decrease in the protein size due to the truncation (considering  $D \sim M^{-1/3}$ ). After chromosome

278 degradation, LacI<sup>-41</sup> only showed a small increase in mobility (from  $D^*=1.3 \mu\text{m}^2/\text{s}$  to  $1.5 \mu\text{m}^2/\text{s}$ ) (Fig.  
279 4B-D). To test if this is general, we also measured the diffusion of unconjugated PAmCherry alone and  
280 found no significant change between unperturbed and chromosome-free cells (Fig. 4C). Therefore, the  
281 presence of the chromosome has only a minor influence on the diffusion of a protein that has no affinity  
282 for DNA. This is consistent with observations that the fluorescent proteins mEOS and Kaede diffuse  
283 inside the whole cell volume with no evidence that the presence of the nucleoid hinders their motion  
284 (Bakshi et al., 2011; English et al., 2011). Note that these data do not exclude the possibility that DNA  
285 sieving may hinder the movement of proteins and macromolecular complexes that are much larger than  
286 LacI and fluorescent proteins, such as 70S ribosomes which are occluded from the nucleoid (Fig. 2C,  
287 and Sanamrad et al., 2014).

288

### 289 **Transient DNA interactions strongly affect the mobility of diverse DNA-binding proteins.**

290 Having established that chromosome degradation increases the mobility of LacI primarily because of a  
291 loss of DNA interactions, we asked if this was generally the case for diverse types of DNA-binding  
292 proteins. We chose four proteins representing distinct types of DNA interactions (Fig. 5A): RNA  
293 polymerase (RNAP) recognizes specific promoter sequences to initiate RNA synthesis and transcribe  
294 genes (Mazumder and Kapanidis JMB 2019); DNA polymerase I (PolI) recognizes gapped or nicked  
295 structures in DNA repair and replication (Joyce and Steitz, 1994); Structural Maintenance of  
296 Chromosomes protein MukB interacts non-specifically with double-stranded DNA to aid chromosome  
297 segregation (Nolivos et al., 2016; Reyes-Lamothe et al., 2012; Rybenkov et al., 2014); Ligase (LigA)  
298 interacts with DNA nicks and catalyzes the joining of DNA ends (Shuman, 2009). These proteins not  
299 only have different biological functions, but also differ in their shapes, molecular weights, oligomeric  
300 states, and intracellular concentrations. The RNAP holoenzyme with the initiation factor  $\sigma^{70}$  is a 449  
301 kDa complex composed of 6 different proteins and present at 3000-6000 copies per cell (Bakshi et al.,  
302 2013; Endesfelder et al., 2013; Stracy et al., 2015). PolI is a monomeric 104 kDa protein with two  
303 globular domains connected by a flexible linker and present at  $\sim 500$  copies per cell (Uphoff et al., 2013).  
304 MukB has a characteristic elongated SMC protein fold with globular domains on either end of 50-nm  
305 long coiled-coil domains. Approximately 100 MukB homodimers per cell likely form large 890 kDa  
306 complexes with MukE and MukF proteins (Badrinarayanan et al., 2012). Ligase is a monomeric 73 kDa  
307 enzyme present at a  $\sim 100$  copies per cell that encircles the DNA as a C-shaped protein clamp  
308 (Nandakumar et al., 2007; Shuman, 2009).

309

310 Considering the differences in the function and physical characteristics of RNAP, PolI, MukB, and  
311 LigA, any shared aspects of their diffusion behavior are likely to indicate universal mechanisms of the  
312 DNA target search. In unperturbed cells, a large fraction of RNAP-PAmCherry and MukB-PAmCherry

313 molecules were immobile or slowly diffusing (RNAP:  $D^* = 0.36 \mu\text{m}^2/\text{s}$ , MukB:  $D^* = 0.39 \mu\text{m}^2/\text{s}$ ),  
314 whereas Pol1-PAmCherry and LigA-PAmCherry molecules were rarely immobile for the entire  
315 trajectory and diffused faster ( $D^* = 1.0 \mu\text{m}^2/\text{s}$  and  $D^* = 1.2 \mu\text{m}^2/\text{s}$  respectively) (Fig. 5B), consistent  
316 with our previous observations (Badrinarayanan et al., 2012; Stracy et al., 2015; Uphoff et al., 2013).  
317 Despite the differences in the diffusion profiles, a unifying feature was the clear nucleoid-association  
318 of the tracks for all three proteins in unperturbed cells (Fig. 5B; Fig. 2). Chromosome degradation had  
319 the same effects for all four proteins (compare Fig. 5B and C): the populations of long-lived immobile  
320 molecules disappeared, and diffusion of the mobile proteins increased substantially (RNAP:  $D^* = 1.2$   
321  $\mu\text{m}^2/\text{s}$ , Pol1:  $D^* = 1.9 \mu\text{m}^2/\text{s}$ , MukB:  $D^* = 0.66 \mu\text{m}^2/\text{s}$ , MukB:  $D^* = 1.9 \mu\text{m}^2/\text{s}$ ) (Fig. 5C). Furthermore,  
322 the tracks filled the entire cytoplasm of chromosome-free cells (Fig. 5C). These results match our  
323 observations for the Lac repressor (Fig. 4), and taken together, they demonstrate that transient DNA  
324 interactions dictate the mobility and spatial distribution of diverse types of DNA-binding proteins.

325

### 326 **The mobility of DNA-binding proteins shows a steep size-dependence in chromosome-free cells**

327 Accurate quantification of diffusion coefficients from single-molecule tracking experiments requires  
328 consideration of several biases such as localization error and confinement within the cell volume  
329 (especially for rapidly moving molecules) (Uphoff, 2016). In order to account for these potential biases  
330 to determine accurate  $D$  values from experimentally measured  $D^*$ , we applied stochastic Brownian  
331 motion simulations to generate artificial single-molecule tracks using an identical number of molecules  
332 inside the same segmented 3D cell volumes as in the experimental data (Fig. 6A). Localization error  
333 and stochastic disappearance of tracks due to photobleaching were also modeled, resulting in the same  
334 sampling and biases as in the experimental  $D^*$  distributions. We determined an unbiased estimate of  
335 the diffusion coefficient  $D$  from the best match (according to a least-squares metric) between  $D^*$   
336 distributions observed in experiments and those obtained from simulations with a range of input  
337 diffusion coefficients.

338 Using this procedure, we estimated the mean unbiased diffusion coefficients of LacI, RNAP, Pol1,  
339 LigA, and MukB molecules after chromosome degradation ( $D_{free}$  values in Table 1). To verify that these  
340 values are robust with regards to the data acquisition and simulation parameters, we also performed  
341 single-molecule tracking experiments at three-fold shorter camera exposure times (5 ms) and obtained  
342 the same results from the corresponding simulations (Fig. S6). Although there was no correlation  
343 between the mass and the diffusion coefficient of DNA-binding proteins in unperturbed cells ( $D_{mobile}$ ),  
344 we found a clear inverse relation in chromosome-free cells ( $D_{free}$ ) (Fig. 6B). Fitting a power-law  $D_{free} =$   
345  $c \cdot M^\alpha$  yielded an exponent of  $\alpha = -0.75$ , showing that protein mobility decreases more steeply with  
346 increasing mass than predicted by the Stokes-Einstein model ( $\alpha = -0.33$ ). Therefore, the crowded  
347 cytoplasm has sieving properties even in the absence of the chromosome meshwork. Indeed, the

348 diffusion of DNA-binding proteins in DNA-free cells shows a similar mass dependence as cytoplasmic  
349 proteins that have no DNA-binding function in unperturbed cells ( $\alpha = -0.7$ ) (Mika and Poolman, 2011).

350

### 351 **Transient DNA-binding events dominate the target search.**

352 Comparison of the diffusion coefficient in unperturbed cells versus chromosome-free cells allows  
353 quantifying the contribution of non-specific DNA interactions to the observed mobility of DNA-binding  
354 proteins during the target search. By simulating molecules rapidly interconverting between freely  
355 diffusing (with  $D_{free}$  determined from chromosome-free cells) and DNA-bound ( $D_{bound} = 0.04 \mu\text{m}^2/\text{s}$ )  
356 we can establish the fraction of time a protein spends transiently bound to DNA,  $\Phi_{\text{transient\_binding}}$ , which  
357 best recapitulates the observed mobility of mobile molecules during their target search measured in  
358 unperturbed cells ( $D^*_{\text{mobile}}$ , Fig. 1B). Using this approach we find that  $\Phi_{\text{transient\_binding}} > 0.5$  for RNAP,  
359 PolI, MukB, and LigA, demonstrating that they spend the majority of their search process non-  
360 specifically bound to DNA ( $\Phi_{\text{transient\_binding}}$  RNAP: 87%, LacI: 93%, PolI: 61%, MukB: 58%; LigA:  
361 60%) (Fig. 6C). The value for LacI is in good agreement with a previous estimate (Elf et al., 2007).  
362 Including the populations of long-lived immobile molecules measured in unperturbed cells  
363 (representing molecules likely to be bound at specific DNA target sites, Fig. 1) in the calculations, the  
364 total percentage of DNA-bound molecules at any time is even higher (RNAP: 93%, LacI: 96%, PolI:  
365 63%, MukB: 82%; LigA: 63%) (Fig. 6D). Based on these results, we report a quantitative partitioning  
366 of DNA-binding proteins into three distinct states of mobility: long-lived specific binding at DNA target  
367 sites, transient non-specific DNA-binding, and free diffusion between DNA strands (Fig. 6C-D).

368 Using the estimate of  $\alpha = -0.75$  to extrapolate  $D_{free}$  and the measured % of long-lived DNA binding and  
369 the measured  $D^*_{\text{mobile}}$  values, we performed the same partitioning of diffusive states for all the DNA-  
370 binding proteins considered in this study (Table 1). In all cases, the fraction of the target search spent  
371 non-specifically bound to DNA was  $>50\%$ , and for the small nucleoid associated protein HU this  
372 estimated fraction was as high as 99%.

373

## 374 **DISCUSSION**

375 Our study demonstrates the ubiquity of transient non-specific DNA interactions for diverse DNA-  
376 binding proteins *in vivo*. Despite their different sizes, DNA targets, mobility, and copy numbers in the  
377 cell, the target search of all the DNA-binding proteins examined here is dominated by transient non-  
378 specific DNA binding. Considering such widespread and frequent non-specific DNA interactions of all  
379 types of DNA-binding proteins, an important question is how these in turn affect DNA transactions.  
380 Our catalogue of the intracellular mobility of different types of DNA-binding proteins can serve as a

381 general reference and should aid ongoing efforts to generate physical models of the intracellular  
382 environment.

383 Our analysis shows that the chromosome DNA mesh does not constitute a physical barrier for the  
384 intracellular motion of proteins (at least up to a protein weight of 100 kDa). In fact, mobile DNA-  
385 binding proteins (even large complexes such as RNAP) are enriched in the densest regions of the  
386 nucleoid by frequent non-specific DNA interactions. These results demonstrate that the apparent  
387 mobility of DNA-binding proteins depends on DNA-binding activity rather than molecular weight, as  
388 concluded from previous FRAP experiments (Kumar et al., 2010). While we have found no evidence  
389 of a nucleoid sieving effect for DNA-binding proteins during their target search, previous reports have  
390 established that large macromolecular complexes which do not bind DNA, such as protein aggregates,  
391 70S ribosomes, and MS2-RNA systems are excluded from the nucleoid (Landgraf et al., 2012; Lindner  
392 et al., 2008; Stracy et al., 2015; Stylianidou et al., 2014). Smaller non-DNA-binding complexes such as  
393 individual ribosomal subunits appear to diffuse freely through the nucleoid (Sanamrad et al., 2014).  
394 Together, these findings are consistent with the view that DNA-interacting proteins can diffuse freely  
395 in the whole cell compartment and are enriched within the nucleoid volume due to frequent non-specific  
396 interactions with the DNA. Protein hopping or sliding along the DNA can enhance the search efficiency  
397 for any individual protein, while overcrowding the chromosome with non-specifically bound proteins  
398 would globally reduce the search kinetics due to the obstruction of target sites and sliding collisions (Li  
399 et al., 2009). This trade-off likely influenced the evolution of protein abundances and their non-specific  
400 DNA binding affinities.

401 Given the diversity of the proteins we have tested, their target-specific DNA interactions are likely to  
402 be very different from each other, suggesting that a more universal interaction plays the largest role in  
403 the abundant transient DNA binding during the target search. We speculate that the electrostatic  
404 interaction between positively charged functional groups on the surface of the proteins and the largely  
405 invariant negatively charged phosphate backbone of the DNA may drive this phenomenon (Kalodimos  
406 et al., 2004; Redding and Greene, 2013). Indeed, the surface charge of proteins strongly affects their  
407 mobility in cells (Elowitz et al., 1999; Schavemaker et al., 2017), and high intracellular salt  
408 concentrations can disrupt DNA-binding *in vivo* (Cagliero and Jin, 2013). The abundance of non-  
409 specific binding also suggests that the percentage of the chromosome occupied by proteins may be  
410 higher than expected. Based on the combined percentage of DNA-bound proteins (both specific and  
411 non-specific) in Table 1, together with literature estimates of their copy number and DNA footprint, we  
412 estimate that at any given time 28% of the chromosome is occupied by the 11 proteins studied (12%  
413 long-lived binding and 16% transient binding, see Methods). These proteins represent just a fraction of  
414 all DNA-binding proteins, suggesting the total DNA occupancy of the entire proteome is substantially  
415 higher. This high occupancy, or chromosome-crowding, highlights the importance of studying protein-  
416 DNA interaction in the native cellular environment. Besides the target search, non-specific DNA

417 binding likely also influences the dissociation of proteins from their specific target sites. Several studies  
418 have shown that competition with proteins in solution accelerates DNA unbinding due to invasion of a  
419 partially-dissociated state (Chen et al., 2015; Gibb et al., 2014; Graham et al., 2011; Loparo et al., 2011).  
420 Although this has been demonstrated for exchanges between identical proteins in solution and on DNA,  
421 the overwhelming abundance of other DNA-binding proteins and their frequent transient associations  
422 with DNA likely contribute significantly to the turnover of DNA-bound proteins in vivo. Thus, non-  
423 specific DNA interactions play a crucial role in both the search and the dissociation of DNA-binding  
424 proteins.

425 Beyond these fundamental implications, our chromosome-degradation system has broader potential  
426 applications in synthetic biology and has benefits compared to alternative approaches such as  
427 chromosome-free minicells. Minicells can be generated by forcing aberrant cell divisions close to the  
428 cell poles, however these cells have a perturbed makeup of proteins and contain few DNA binding  
429 proteins (Shepherd et al., 2001). In contrast, our chromosome-degraded cells retain the DNA binding  
430 proteins and maintain the same cell size and geometry. Moreover, we have shown that DNA-free *E.*  
431 *coli* cells maintain ATP levels and continue to produce plasmid-encoded proteins for several hours,  
432 enabling targeted expression of exogenous genes without interference from chromosomal gene  
433 expression. Removing all endogenous gene circuitry from *E. coli* cells but maintaining the transcription  
434 machinery provides customizable non-viable containers for a range of applications, including  
435 expression of synthetic gene circuits, biosensing, and drug delivery (Caliando and Voigt, 2015; Fan et  
436 al., 2020; MacDiarmid et al., 2007; Rampley et al., 2017).

437

## 438 **Methods**

### 439 **Bacterial strains, plasmids and growth**

440 Bacterial strains and plasmids are listed in Table S1. All experiments were performed in *E. coli* TB28  
441 background strain (MG1655 *ΔlacIZYA*) (Bernhardt and de Boer, 2005). PAmCherry fusion proteins  
442 expressed from their endogenous chromosome loci were previously characterized: RNAP, HU and HN-  
443 S (Stracy et al., 2015), LacI (Garza de Leon et al., 2017), PolI and LigA (Uphoff et al., 2013),  
444 UvrA (Stracy et al., 2016), MutS (Uphoff et al., 2016), ParC (Zawadzki et al., 2015), MukB  
445 (Badrinarayanan et al., 2012), GyrA (Stracy et al., 2019). Fusions were moved to *E. coli* TB28 strain  
446 by P1 transduction. Construction of plasmids expressing LacI-PAmCherry or LacI mutant are described  
447 in (Garza de Leon et al., 2017). Unconjugated PAmCherry was produced from the plasmid pBADHisB  
448 PAmCherry1 (Endesfelder et al., 2013). ParB-mCherry was produced from pSN70 plasmid (Nolivos et  
449 al., 2019). The *I-SceI* cut site (*I-SceI*<sup>CS</sup>) is followed by *cat* gene (chloramphenicol resistance) flanked  
450 by *frt* sites as described previously (Lesterlin et al., 2013). *I-SceI*<sup>CS</sup> was inserted in two chromosome  
451 loci by  $\lambda$ -Red recombination (Datsenko and Wanner, 2000); *ilvA* (3953 kb) close to the origin of

452 replication, and *ydeO* (1580 kb) in the *terminus* region. Using sequential P1 transduction, we  
453 constructed the OT strain (for *Ori-Ter*) carrying *ilvA::I-SceI<sup>CS</sup>* and *ydeO::I-SceI<sup>CS</sup>*. After each  
454 transduction round, the *cat* gene was removed using Pcp20 plasmid (Datsenko and Wanner, 2000). P1  
455 transduction was also used to transfer *recA*- mutation *recAT233C-Tet* or *minC-Ypet* allele (Bisicchia et  
456 al., 2013) alleles. Unless otherwise stated, cells were grown at 30°C in M9 medium supplemented with  
457 glucose (0.2%). When appropriate, growth media were supplemented with Ampicillin (Ap) 100 µg/ml,  
458 Chloramphenicol (Cm) 20 µg/ml or Kanamycin (Kn) 50 µg/ml.

459

#### 460 **Sample preparation for microscopy**

461 OT strains carrying two *I-SceI<sup>CS</sup>* were transformed with pSN1 plasmid carrying the *I-SceI* gene under  
462 the control of the *P<sub>lac</sub>* promoter and plated on LB agarose plates containing 0.2 % glucose and ampicillin  
463 at 30°C. Transformant clones were propagated on LB agarose plates containing 0.2 % glucose and  
464 ampicillin. Transformation was performed *de novo* before each experiment since strains carrying *I-*  
465 *SceI<sup>CS</sup>* and the pSN1 plasmid exhibit genetic instability due to leaky *I-SceI* expression causing  
466 unrepairable DNA double-stranded breaks in the *recA*- strain. For each strain, a single colony was  
467 inoculated in M9 minimal medium supplemented with 0.2% glucose and ampicillin and incubated  
468 overnight at 30°C with agitation (140 rpm). The next day, overnight cultures were diluted and grown to  
469 early exponential phase (OD<sub>600nm</sub> ~ 0.2). 0.2% arabinose was added to induce the production of I-SceI  
470 endonuclease and initiate chromosome degradation in the *recA*- strains. Cultures were incubated at 30°C  
471 with agitation for the duration indicated in the text and figures (120 min for complete DNA degradation)  
472 before microscopy. For control experiments in fixed cells, 2.5% paraformaldehyde was added to the  
473 growth media for 1 hour prior to imaging. Cell filamentation was induced by addition of cephalixin at  
474 final concentration of 5 µg/ml.

475 The cell suspension was concentrated by centrifugation (benchtop centrifuge at 6000 rpm), removal of  
476 the supernatant and resuspension in 1/10<sup>th</sup> of the initial sample volume. Cells were immobilized on pads  
477 of 1% low-fluorescence agarose (Biorad) in M9 medium with 0.2% glucose as previously described  
478 (Lesterlin and Duabry, 2016). For PALM microscopy 0.17 mm thickness coverslips were heated in an  
479 oven to 500°C to remove any background fluorescent particles before use. For quantification of  
480 chromosome degradation and MinC-Ypet oscillation by wide-field epifluorescence imaging, DNA  
481 staining was performed by incubating the cell suspension for 15 min with 2',6'-diamidino-2-  
482 phenylindole (DAPI) at 4 µg/ml prior to cell concentration and imaging. For multi-color imaging of the  
483 nucleoid and PAmCherry fusions, we stained DNA with 500 nM SytoGreen for 15 min before imaging  
484 (because DAPI excitation would cause photoactivation of PAmCherry).

485

#### 486 **Wide-field epifluorescence microscopy imaging**

487 Wide-field epifluorescence microscopy imaging of DAPI-stained cells was carried out on an Eclipse  
488 Ti-E microscope (Nikon), equipped with 100s/1.45 oil Plan Apo Lambda phase objective, Flash4 V2

489 CMOS camera (Hamamatsu), and using NIS Elements software for image acquisition. Acquisition was  
490 performed in phase contrast and epifluorescence mode using 50% power of a Fluo LED Spectra X light  
491 source at 405 nm and 560 nm excitation wavelengths for DAPI and ParB-mCherry, respectively.

492 Wide-field imaging of MinC-Ypet was carried out on a Nikon Eclipse TE2000-U microscope equipped  
493 with a 100X objective, CCD camera (Cool-SNAP by Photometrics) and Metamorph 6.2 acquisition  
494 software. Time-lapse movies were acquired in phase contrast and epifluorescence at 2-s intervals with  
495 50 ms exposure for MinC-Ypet at 30°C.

496

#### 497 *Widefield epifluorescence image analysis*

498 Cells were automatically detected using the MicrobeJ plugin for Fiji (Ducret et al., 2016). Intracellular  
499 DAPI or ParB-mCherry mean fluorescence intensity (a.u.) was automatically extracted and plotted  
500 using the MicrobeJ results interface. For analysis of MinC oscillation, cells were outlined using the  
501 MATLAB-based tool MicrobeTracker (Sliusarenko et al., 2011). The fluorescence signal was  
502 integrated across the cross-section of each cell to generate a one-dimensional fluorescence profile in  
503 each frame. The fluorescence signal was normalized to the total fluorescence in each frame to remove  
504 photobleaching effects and facilitate MinC-Ypet localization analysis. The fluorescence signals  
505 obtained from each cell were further analyzed by generating kymographs using custom MATLAB code.  
506 The width of the kymograph corresponds to the cell length L. We integrated the fluorescence intensity  
507 for both cell halves at in each frame,

$$508 \quad F_{x,left}(t) = \int_{x=0}^{L/2} f(x,t) dx \quad F_{x,right}(t) = \int_{x=L/2}^L f(x,t) dx$$

509 By fitting the data to a trigonometric function the oscillation period is calculated from the angular  
510 frequency  $\omega = \frac{2\pi}{T}$

$$511 \quad F_{x,right}(t) = a \cdot \cos(\omega \cdot t) + b \cdot \sin(\omega \cdot t)$$

512 The time-averaged concentration profile of MinC is obtained by integration of the entire kymograph  
513 over all frames,

$$514 \quad F_t(x) = \int_t f(x,t) dt$$

515 For analyzing MinC oscillations in filamentous cells, a slightly modified kymograph analysis was used.  
516 The MinC concentration profile was determined as described above. The positions of the fluorescence  
517 minima  $x_{min}$  were used to split the kymographs into several stripes. The overall oscillation period  $T_m$   
518 was calculated as the average of all oscillation periods determined for each stripe in the kymograph.  
519 The oscillation wavelength was determined from the distance between two neighboring peaks.  
520 Depending on the length of the cell and the number of oscillations a set of wavelengths was determined  
521 from which a mean wavelength was calculated as



522 
$$\lambda = \frac{1}{n} \sum_{i=1}^n (x_{min,i+1} - x_{min,i})$$

523 Where the number  $n$  of oscillations corresponds to the number of peaks – 1.

524

### 525 **Live-cell photoactivated single-molecule tracking**

526 Live cell photoactivated single-molecule tracking was performed on a custom-built total internal  
527 reflection fluorescence (TIRF) microscope built around the Rapid Automated Modular Microscope  
528 (RAMM) System (ASI Imaging) as previously described (Uphoff, 2016). PAmCherry activation was  
529 controlled by a 405 nm laser and excited with 561 nm. All lasers were provided by a multi-laser engine  
530 (iChrome MLE, Toptica). At the fiber output, the laser beams were collimated and focused (100x oil  
531 immersion objective, NA 1.4, Olympus) onto the sample under an angle allowing for highly inclined  
532 thin illumination (Tokunaga et al., 2008). Fluorescence emission was filtered by a dichroic mirror and  
533 filter (ZT405/488/561rpc & ZET405/488/561NF, Chroma). PAmCherry emission was projected onto  
534 an EMCCD camera (iXon Ultra, 512x512 pixels, Andor). The pixel size was 96 nm. Transmission  
535 illumination was provided by an LED source and condenser (ASI Imaging and Olympus). Sample  
536 position and focus were controlled with a motorized piezo stage, a z-motor objective mount, and  
537 autofocus system (MS-2000, PZ-2000FT, CRISP, ASI Imaging). Movies were acquired under  
538 continuous laser excitation with exposure times of 15 ms or 5 ms for 20,000 frames at 20°C. Camera  
539 readout was 0.48 ms giving frame intervals of 15.48 ms or 5.48 ms, respectively. We also recorded a  
540 transmitted light snapshot for segmenting cells in each movie. For imaging SytoGreen, snapshots with  
541 488 nm excitation with a 50 ms exposure time were acquired prior to PAmCherry imaging.

542

### 543 *Localization and tracking*

544 Single-molecule-tracking analysis was performed using custom-written MATLAB software  
545 (MathWorks) as previously described (Uphoff et al., 2014): fluorophore images were identified for  
546 localization by band-pass filtering and applying an intensity threshold to each frame of the movie.  
547 Candidate positions were used as initial guesses in a two-dimensional elliptical Gaussian fit for high-  
548 precision localization. Free fit parameters were x-position, y-position, x-width, y-width, elliptical  
549 rotation angle, intensity, background. Localizations were segmented based on cell outlines obtained  
550 from MicrobeTracker applied to the brightfield snapshots. Single-particle tracking analysis was  
551 performed by adapting the MATLAB implementation of the algorithm described in (Crocker and Grier,  
552 1996). Positions were linked to a track if they appeared in consecutive frames within a window of 5  
553 pixels (0.48  $\mu\text{m}$ ). When multiple localizations fell within the tracking window, tracks were linked such  
554 that the sum of step distances was minimized. We used a ‘memory’ parameter of 1 frame to allow for  
555 transient disappearance of the fluorophore within a track due to blinking or missed localization.

556

557 *Measuring the diffusion of tracked molecules*

558 We determined the mobility of each molecule by calculating an individual apparent diffusion  
559 coefficient,  $D_i^*$ , from the one-step mean-squared displacement (MSD) of the track using:

560

561 
$$D_i^* = \frac{1}{4n\Delta t} \sum_{i=1}^n [x(i\Delta t) - x(i\Delta t + \Delta t)]^2 + [y(i\Delta t) - y(i\Delta t + \Delta t)]^2$$

562

563 Where  $x(t)$  and  $y(t)$  are the coordinates of the molecule at time  $t$ , the frame time of the camera is  $\Delta t$ ,  
564 and  $n$  is the number of frames over which the molecule is tracked. For a molecule diffusing with an  
565 apparent diffusion coefficient  $D^*$ , the probability of measuring a  $D_i^*$  by tracking it over  $n$  frames, is  
566 given by (Vrljic et al., 2002):

567

568

569 
$$p(D_i^*) = \frac{1}{(n-1)!} * \left(\frac{n}{D}\right)^n * (D_i^*)^{n-1} * \exp\left(\frac{-nD_i^*}{D}\right)$$

570

571 In order to determine the apparent diffusion coefficient,  $D^*$ , from the population of individual single-  
572 molecule  $D_i^*$  values, longer tracks were truncated after 5<sup>th</sup> localization (i.e.  $n = 4$ ). The  $D_i^*$  distribution  
573 was then fitted with the equation for  $n = 4$  :

574 
$$p(D_i^*) = \frac{1}{6} * \left(\frac{4}{D}\right)^4 * (D_i^*)^3 * \exp\left(\frac{-4D_i^*}{D}\right)$$

575

576 Fits were performed using maximum likelihood estimation in MATLAB. For unperturbed cells the  
577 protein diffusion distributions were fit with a model containing two molecular species with diffusion  
578 coefficients  $D_1^*$  and  $D_2^*$ : representing immobile molecules bound to DNA for the entire trajectory, and  
579 mobile molecules diffusing and binding only transiently to DNA:

580 
$$p(D_i^*) = \left[ \frac{A_1}{6} * \left(\frac{4}{D_1^*}\right)^4 * (D_i^*)^3 * \exp\left(\frac{-4D_i^*}{D_1^*}\right) \right] + \left[ \frac{(1-A)}{6} * \left(\frac{4}{D_2^*}\right)^4 * (D_i^*)^3 * \exp\left(\frac{-4D_i^*}{D_2^*}\right) \right]$$

581

582 where  $A$  and  $1 - A$  are the fraction of molecules found in each state. The localization uncertainty,  $\sigma_{\text{loc}}$ ,  
583 manifests itself as a positive offset of  $\sigma_{\text{loc}}^2/\Delta t$  in the  $D^*$  value (Michalet and Berglund, 2012). Based on  
584 the estimated localization uncertainty of  $\sim 35$  nm for our measurements, we expected a positive shift in  
585 the mean  $D^*$  value of immobile molecules to  $\sim 0.7 \mu\text{m}^2\text{s}^{-1}$ . Where indicated error bars represent 95%  
586 confidence intervals obtained from fitting the  $D^*$  distribution for 1000 bootstrap resamplings with  
587 replacement of individual segmented cells. For each bootstrap the tracks within the sampled cells were  
588 pooled and fitted as described above.

589

590 To plot maps of tracks from mobile and immobile molecules, we used a threshold of  $0.15 \mu\text{m}^2\text{s}^{-1}$  to  
591 separate the populations.

592

### 593 *Monte Carlo diffusion simulations*

594 The apparent diffusion coefficients determined experimentally through particle tracking do not take  
595 into account three-dimensional confinement in the bacterial cell. We followed a similar rationale as  
596 before to remove this bias (Uphoff et al., 2013): we simulated Brownian motion confined within 3D  
597 cell volumes obtained from the segmented 2D brightfield images. The distance from the midline to the  
598 cell edge was used as the radius of a cylindrical volume for each length segment of a cell. For each cell  
599 diffusion simulations of the same number of molecules as measured experimentally were performed.  
600 Each 15 ms frame was split into 100 sub-frames with Gaussian-distributed displacements in each sub-  
601 frame. Each molecule trajectory was given a random starting time to mimic stochastic photoactivation,  
602 and a duration sampled from an exponential distribution with a mean time equal to our experimentally  
603 determined photobleaching lifetime (85 ms). The sub-frame distributions were then averaged to give a  
604 position for each frame, and a localization error sampled from a Gaussian distribution with  $\sigma_{\text{loc}} = 35$   
605 nm was added. The list of simulated localizations, with their corresponding frame numbers was then  
606 analyzed using the same algorithms with the same settings as for experimental data. The best estimate  
607 for the unbiased diffusion coefficient was determined by running the simulations for different  $D$  values  
608 between 0 and  $10 \mu\text{m}^2\text{s}^{-1}$  and selecting inputted  $D$  value from the simulated  $D^*$  distribution which best  
609 approximates (based on the least squares error) the experimentally obtained  $D^*$  distribution. Since  
610 diffusion coefficients in DNA-free cells were much higher than in unperturbed cells we also performed  
611 experiments and simulations for Poll and MukB at 5.48 ms exposure times to verify the same  
612 underlying unbiased diffusion coefficients were obtained independent of the data acquisition  
613 conditions. 95% confidence intervals were estimated by fitting the experimental  $D^*$  distribution for  
614 1000 bootstrap resamplings with replacement of individual segmented cells as described previously.  
615 Simulations were then performed to determine inputted  $D$  value which best approximates the higher  
616 and lower confidence bounds from the experimentally determined  $D^*$  values.

617

618 We hypothesized that the observed diffusion of DNA-binding proteins in unperturbed cells represented  
619 mobile molecules interconverting between  $D_{\text{free}}$  and  $D_{\text{bound}}$  states. By comparing diffusion in  
620 unperturbed and DNA-free cells, it is possible to estimate the relative occupation of the states but not  
621 the absolute duration a molecule spends in each state. To simulate molecules interconverting between  
622 these states, we used the  $D_{\text{free}}$  value based on the simulations of DNA-free cells, and a  $D_{\text{bound}}$  value of  
623  $0.04 \mu\text{m}^2\text{s}^{-1}$ . Because the  $D_{\text{mobile}}$  population appears as a single species the interconversions must occur  
624 on a timescale below the observation window per track (75 ms, 5 frames of 15 ms). We therefore

625 simulated the duration of  $D_{\text{bound}}$ ,  $t_{\text{bound}}$ , by randomly sampling from an exponential distribution with a  
626 mean of 1 ms. We performed simulations for a range of ratios of durations in the  $D_{\text{free}}$  and  $D_{\text{bound}}$  states  
627 by varying,  $t_{\text{free}}$ , the duration of free diffusion between binding events. Using least squares optimization,  
628 we determined the ratio which best recapitulated the experimental  $D^*_{\text{mobile}}$  value determined from fitting  
629 the experimental  $D^*$  distribution.

630

### 631 *Chromosome occupancy calculations*

632 To estimate the percentage of the chromosome occupied by proteins we used literature estimates of the  
633 DNA footprint of each protein. RNAP (70bp, (Ross and Gourse, 2005); HU (36bp, Gruber, 2014); H-  
634 NS (30bp; van der Valk et al., 2017); DNA gyrase (100bp, Reece and Maxwell, 1991). Where no  
635 DNA footprint estimates could be found we assumed a footprint of 10bp. The total bp occupied was  
636 calculated by the molecules/cell multiplied by the total fraction binding (including stable binding and  
637 transient binding) in Table 1, and the DNA footprint, giving 1.96Mb of DNA. Under the minimal media  
638 growth conditions in this study there are on average 1.5 chromosomes per cell, totaling 6.9Mb of DNA  
639 (Wang et al., 2005).

640

**Table 1. Quantitative partitioning of DNA-binding protein activity**

| Protein                                          | Function                                     | Size of PAmCherry labelled protein or protein complex (kDa) <sup>1</sup> | Molecules/cell | $D^*_{mobile}$ ( $\mu\text{m}^2/\text{s}$ ) | $D_{free}$ ( $\mu\text{m}^2/\text{s}$ ) | % of long-lived DNA-bound molecules | % transient DNA-bound molecules | % freely diffusing molecules | Copy number reference                      |
|--------------------------------------------------|----------------------------------------------|--------------------------------------------------------------------------|----------------|---------------------------------------------|-----------------------------------------|-------------------------------------|---------------------------------|------------------------------|--------------------------------------------|
| RNA Polymerase ( $\beta'$ subunit)               | transcription                                | 480 (holoenzyme)                                                         | 4,000          | $0.36 \pm 0.01$                             | $2.7 \pm 0.1$                           | $45 \pm 2$                          | $48 \pm 2$                      | $7 \pm 1$                    | (Bakshi et al., 2013; Stracy et al., 2015) |
| DNA polymerase 1 (PolA)                          | DNA repair / replication                     | 128 (monomer)                                                            | 500            | $1.05 \pm 0.01$                             | $6.6 \pm 0.2$                           | $4 \pm 1$                           | $61 \pm 2$                      | $35 \pm 2$                   | (Uphoff et al., 2013)                      |
| MukBEF (MukB subunit)                            | chromosome organization/                     | 1000 (dimer)                                                             | 100            | $0.44 \pm 0.01$                             | $1.2 \pm 0.1$                           | $58 \pm 2$                          | $24 \pm 1$                      | $18 \pm 1$                   | (Badrinarayana n et al., 2012)             |
| DNA Ligase (LigA)                                | DNA repair / replication                     | 102 (monomer)                                                            | 100            | $1.22 \pm 0.02$                             | $6.9 \pm 0.3$                           | $7 \pm 1$                           | $56 \pm 2$                      | $37 \pm 2$                   | (Uphoff et al., 2013)                      |
| Lac repressor (LacI)                             | gene regulation                              | 220 (tetramer)                                                           | 40             | $0.40 \pm 0.01$                             | $3.3 \pm 0.2$                           | $41 \pm 3$                          | $55 \pm 3$                      | $4 \pm 1$                    | (Garza de Leon et al., 2017)               |
| Heat Unstable protein (HU)                       | nucleoid associated protein/ gene regulation | 48 (heterodimer)                                                         | 30,000         | $0.33 \pm 0.01$                             | $12.6 \pm 4.8^\dagger$                  | $23 \pm 1$                          | $76 \pm 1^\dagger$              | $0.8 \pm 2^\dagger$          | (Gruber, 2014)                             |
| Histone-like nucleoid structuring protein (H-NS) | nucleoid associated protein/ gene regulation | 87 (dimer)                                                               | 20,000         | $0.41 \pm 0.01$                             | $8.0 \pm 2.2^\dagger$                   | $73 \pm 2$                          | $27 \pm 2^\dagger$              | $0.3 \pm 1^\dagger$          | (Katayama et al., 1996)                    |
| MutS                                             | DNA repair                                   | 248 (dimer)                                                              | 100            | $0.37 \pm 0.01$                             | $3.7 \pm 1.7^\dagger$                   | $26 \pm 2$                          | $69 \pm 7^\dagger$              | $5 \pm 1^\dagger$            | (Uphoff et al., 2016)                      |
| Topoisomerase IV (ParC subunit)                  | Supercoiling/ decatenation                   | 366 (heterotetramer)                                                     | 80             | $0.40 \pm 0.01$                             | $2.7 \pm 1.8^\dagger$                   | $37 \pm 2$                          | $52 \pm 18^\dagger$             | $11 \pm 7^\dagger$           | (Zawadzki et al., 2015)                    |

|                              |              |                         |     |                 |                       |            |                     |                    |                       |
|------------------------------|--------------|-------------------------|-----|-----------------|-----------------------|------------|---------------------|--------------------|-----------------------|
| UvrA                         | DNA repair   | 270<br>(dimer)          | 80  | $0.38 \pm 0.02$ | $3.4 \pm 1.7^\dagger$ | $43 \pm 2$ | $51 \pm 8^\dagger$  | $6 \pm 18^\dagger$ | (Stracy et al., 2016) |
| DNA gyrase<br>(GyrA subunit) | Supercoiling | 424<br>(heterotetramer) | 600 | $0.35 \pm 0.01$ | $2.4 \pm 1.8^\dagger$ | $55 \pm 1$ | $39 \pm 17^\dagger$ | $7 \pm 8^\dagger$  | (Stracy et al., 2019) |

<sup>†</sup>Note that in some cases the functional complex contains more than one copy of the subunit which has been labelled, and the complex therefore contains more than one PAmCherry protein. <sup>†</sup>Denotes predicted values based on extrapolation of  $D_{free}$  values in shown in Fig. 6.

## Figures Legends

**Figure 1. Intracellular mobility of diverse types of DNA-binding proteins in live *E. coli* cells is highly variable and unrelated to their molecular weights.** (A) Illustration of photoactivated single-molecule tracking, showing example fluorescence images and trajectories of a mobile molecule (top) and immobile molecule (bottom) within the cell (green outline). Scale bar 1  $\mu\text{m}$ . (B) Histograms of apparent diffusion coefficients  $D^*$  (grey bars) for diverse DNA-binding proteins, fitted with a model (black dashed line) of a mixture of immobile (red) and mobile molecules (blue). The number of cells ( $n_c =$ ) and the numbers of tracks ( $n_t =$ ) analyzed are indicated. (C) Percentages of long-lived binding molecules obtained from fitting  $D^*$  histograms in Fig. 1 with a model of a mixture of immobile and mobile molecules. Error bars represent 95% confidence intervals. (D)  $D_{\text{mobile}}^*$  values for the mobile molecule populations. (E)  $D_{\text{mobile}}^*$  plotted against the cubic root of the molecular weight of the protein complex.

**Figure 2. DNA-binding proteins stay closely associated with the nucleoid during the target search.** (A) Localizations of PolI (PolA-PAmCherry), (B) RNAP (RpoC-PAmCherry), and (C) ribosomal protein S1 (S1-PAmCherry) molecules relative to the nucleoid. From left to right: transmitted light image (scale bar 1  $\mu\text{m}$ ); SytoGreen-stained nucleoid DNA with segmented cell outline; maps showing the tracks of mobile (blue) and immobile (red) PAmCherry fusion proteins in cells. Histograms show localizations across the long cell axis (blue/red bars) together with the SytoGreen fluorescence profile of the nucleoid (green line). (B) Average spatial distributions of PolI, RNAP and ribosomal protein S1 immobile and mobile molecules.

**Figure 3. Generating chromosome-free cells that remain metabolically active.** (A) Schematic of the chromosome-degradation system. The production of I-SceI endonuclease induces the formation of two double-stranded-breaks (DSBs) at *I-SceI* cut-sites inserted at diametrically opposed position on the chromosome. In a *recA*- mutant strain, processing of the two DSBs by RecBCD complexes results in the complete degradation of the chromosome. (B) Chromosome degradation following I-SceI induction is revealed by the loss of DAPI-stained DNA fluorescence (blue) in cells with FM464-labelled membrane (red). Scale bar, 1  $\mu\text{m}$ . (C) Distributions of DAPI fluorescence shows complete chromosome degradation 120 min after I-SceI induction (black dot: mean and outliers, horizontal lines: median, 1<sup>st</sup> and 3<sup>rd</sup> quartiles). The number of cells analyzed ( $n$ ) is indicated. (D) MinC-YPet oscillation in an example chromosome-free cell. Cell filamentation was induced by cephalixin treatment. Transmitted light, DAPI, and MinC-YPet fluorescence images (2 s/frame time lapse) obtained 120 min post I-SceI induction. Scale bar, 1  $\mu\text{m}$ . (E) Kymograph of MinC-YPet oscillation in an example cephalixin-treated

filamentous cell. The width of the kymograph corresponds to the cell long-axis (L). Time-dependent intensity signals in the cell halves are shown in blue and green with the oscillation period  $T_m$ . Time-average concentration profile shown underneath for measuring the oscillation wavelength. (F, G) MinC-YPet oscillation period and wavelength are similar in filamentous cells with and without chromosome degradation. The number of cells analyzed (n) is indicated.

**Figure 4. Diffusion of lac repressor increases in chromosome-free cells.** (A)  $D^*$  histograms of LacI-PAmCherry in unperturbed cells (left) fitted with a model (black dashed line) of a mixture of immobile (red) and mobile molecules (blue).  $D^*$  distribution of LacI-PAmCherry in chromosome-free cells 120 min after I-SceI induction (right) fitted with a model for mobile molecules (green). (B) Mean squared displacement plots corresponding to data in panels (A) and (D). (C) Cumulative distributions of the step lengths between consecutive localizations in unperturbed and in chromosome-free cells for LacI-PAmCherry, LacI<sup>41</sup>-PAmCherry, and unconjugated PAmCherry. The distributions shift to longer steps with increasing diffusion coefficient. (D)  $D^*$  histograms of mutant LacI<sup>41</sup>-PAmCherry in unperturbed cells (left) and in chromosome-free cells 120 min after I-SceI induction (right) fitted with a model for mobile molecules (purple and magenta, respectively).

**Figure 5. Chromosome degradation increases the mobility of diverse types of DNA-binding proteins.** (A) Diagrams of RNAP, PolI, MukB and Ligase DNA-binding properties. (B) Tracks of RNAP-PAmCherry, PolI-PAmCherry, MukB-PAmCherry and LigA-PAmCherry in example cells, with the color of each track representing its  $D^*$  value.  $D^*$  histograms in cells without I-SceI induction, fitted with a model of a mixture of immobile (red) and mobile (blue) molecules. (B) Tracks of RNAP-PAmCherry, PolI-PAmCherry, MukB-PAmCherry and LigA-PAmCherry in example chromosome-free cells 120 min after I-SceI induction with the color of each track representing its  $D^*$  value.  $D^*$  histograms in chromosome-free cells fitted with a model for mobile molecules. The number of cells ( $n_c$ ) and the numbers of tracks ( $n_t$ ) analyzed are indicated in B and C.

**Figure 6. Quantitative partitioning of protein states.** (A) Illustration of Brownian motion simulation to estimate unbiased diffusion coefficients  $D_{mobile}$  (in unperturbed cells) and  $D_{free}$  (in chromosome-free cells). (B)  $D_{mobile}$  and  $D_{free}$  plotted vs molecular weight M on log-scale. Linear fit  $\log(D_{free}) = \alpha \cdot \log(c \cdot M)$ . (C) Partitioning long-lived DNA-binding (orange), transient DNA-binding (purple), and 3D diffusion (blue) states for RNAP and (D) for LacI, PolI, LigA and MukB. (E) The percentage of search time spent nonspecifically bound to DNA for all 11 DNA-binding proteins studied. Blue bars show the



proteins with  $D_{free}$  measured in chromosome-free cells, grey bars show proteins with  $D_{free}$  estimated from the fit in panel B. Error bars correspond to standard deviations.

## REFERENCES

- Bacia, K., Kim, S.A., and Schwille, P. (2006). Fluorescence cross-correlation spectroscopy in living cells. *Nat Methods* 3, 83–89.
- Badrinarayanan, A., Reyes-Lamothe, R., Uphoff, S., Leake, M.C., and Sherratt, D.J. (2012). In vivo architecture and action of bacterial structural maintenance of chromosome proteins. *Science* 338, 528–531.
- Bakshi, S., Bratton, B.P., and Weisshaar, J.C. (2011). Subdiffraction-limit study of Kaede diffusion and spatial distribution in live *Escherichia coli*. *Biophys. J.* 101, 2535–2544.
- Bakshi, S., Dalrymple, R.M., Li, W., Choi, H., and Weisshaar, J.C. (2013). Partitioning of RNA Polymerase Activity in Live *Escherichia coli* from Analysis of Single-Molecule Diffusive Trajectories. *Biophys J* 105, 2676–2686.
- Bernhardt, T.G., and de Boer, P.A.J. (2005). SlmA, a nucleoid-associated, FtsZ binding protein required for blocking septal ring assembly over Chromosomes in *E. coli*. *Mol. Cell* 18, 555–564.
- Bisicchia, P., Arumugam, S., Schwille, P., and Sherratt, D. (2013). MinC, MinD, and MinE Drive Counter-oscillation of Early-Cell-Division Proteins Prior to *Escherichia coli* Septum Formation. *MBio* 4.
- Cabrera, J.E., Cagliero, C., Quan, S., Squires, C.L., and Jin, D.J. (2009). Active Transcription of rRNA Operons Condenses the Nucleoid in *Escherichia coli*: Examining the Effect of Transcription on Nucleoid Structure in the Absence of Transertion. *J Bacteriol* 191, 4180–4185.
- Cagliero, C., and Jin, D.J. (2013). Dissociation and re-association of RNA polymerase with DNA during osmotic stress response in *Escherichia coli*. *Nucleic Acids Res.* 41, 315–326.
- Caliando, B.J., and Voigt, C.A. (2015). Targeted DNA degradation using a CRISPR device stably carried in the host genome. *Nat Commun* 6, 6989.
- Chen, T.-Y., Santiago, A.G., Jung, W., Krzemiński, Ł., Yang, F., Martell, D.J., Helmann, J.D., and Chen, P. (2015). Concentration- and chromosome-organization-dependent regulator unbinding from DNA for transcription regulation in living cells. *Nat Commun* 6, 7445.
- Chow, E., and Skolnick, J. (2017). DNA Internal Motion Likely Accelerates Protein Target Search in a Packed Nucleoid. *Biophys J* 112, 2261–2270.
- Cluzel, P., Surette, M.G., and Leibler, S. (2000). An ultrasensitive bacterial motor revealed by monitoring signaling proteins in single cells. *Science* 287, 1652–1655.
- Crocker, J.C., and Grier, D.G. (1996). When Like Charges Attract: The Effects of Geometrical Confinement on Long-Range Colloidal Interactions. *Phys. Rev. Lett.* 77, 1897–1900.
- Datsenko, K.A., and Wanner, B.L. (2000). One-step inactivation of chromosomal genes in *Escherichia coli* K-12 using PCR products. *Proc. Natl. Acad. Sci. U.S.A.* 97, 6640–6645.

- Di Ventura, B., Knecht, B., Andreas, H., Godinez, W.J., Fritsche, M., Rohr, K., Nickel, W., Heermann, D.W., and Sourjik, V. (2013). Chromosome segregation by the Escherichia coli Min system. *Mol Syst Biol* 9, 686.
- Ducret, A., Quardokus, E.M., and Brun, Y.V. (2016). MicrobeJ, a tool for high throughput bacterial cell detection and quantitative analysis. *Nat Microbiol* 1, 16077.
- Dworsky, P., and Schaechter, M. (1973). Effect of Rifampin on the Structure and Membrane Attachment of the Nucleoid of Escherichia coli. *J Bacteriol* 116, 1364–1374.
- Elf, J., Li, G.-W., and Xie, X.S. (2007). Probing transcription factor dynamics at the single-molecule level in a living cell. *Science* 316, 1191–1194.
- Elmore, S., Müller, M., Vischer, N., Odijk, T., and Woldringh, C.L. (2005). Single-particle tracking of oriC-GFP fluorescent spots during chromosome segregation in Escherichia coli. *J. Struct. Biol.* 151, 275–287.
- Elowitz, M.B., Surette, M.G., Wolf, P.E., Stock, J.B., and Leibler, S. (1999). Protein mobility in the cytoplasm of Escherichia coli. *J. Bacteriol.* 181, 197–203.
- Endesfelder, U., Finan, K., Holden, S.J., Cook, P.R., Kapanidis, A.N., and Heilemann, M. (2013). Multiscale spatial organization of RNA polymerase in Escherichia coli. *Biophys. J.* 105, 172–181.
- English, B.P., Hauryliuk, V., Sanamrad, A., Tankov, S., Dekker, N.H., and Elf, J. (2011). Single-molecule investigations of the stringent response machinery in living bacterial cells. *Proc. Natl. Acad. Sci. U.S.A.* 108, E365-373.
- Erbaş, A., and Marko, J.F. (2019). How do DNA-bound proteins leave their binding sites? The role of facilitated dissociation. *Current Opinion in Chemical Biology* 53, 118–124.
- Erbaş, A., Cruz, M.O. de la, and Marko, J.F. (2019). Receptor-Ligand Rebinding Kinetics in Confinement. *Biophysical Journal* 116, 1609–1624.
- Fan, C., Davison, P.A., Habgood, R., Zeng, H., Decker, C.M., Salazar, M.G., Lueangwattanapong, K., Townley, H.E., Yang, A., Thompson, I.P., et al. (2020). Chromosome-free bacterial cells are safe and programmable platforms for synthetic biology. *PNAS* 117, 6752–6761.
- Feig, M., Harada, R., Mori, T., Yu, I., Takahashi, K., and Sugita, Y. (2015). Complete atomistic model of a bacterial cytoplasm for integrating physics, biochemistry, and systems biology. *J. Mol. Graph. Model.* 58, 1–9.
- Gahlmann, A., and Moerner, W.E. (2014). Exploring bacterial cell biology with single-molecule tracking and super-resolution imaging. *Nat. Rev. Microbiol.* 12, 9–22.
- Garza de Leon, F., Sellars, L., Stracy, M., Busby, S.J.W., and Kapanidis, A.N. (2017). Tracking Low-Copy Transcription Factors in Living Bacteria: The Case of the lac Repressor. *Biophys. J.* 112, 1316–1327.
- Gibb, B., Ye, L.F., Gergoudis, S.C., Kwon, Y., Niu, H., Sung, P., and Greene, E.C. (2014). Concentration-dependent exchange of replication protein A on single-stranded DNA revealed by single-molecule imaging. *PLoS ONE* 9, e87922.
- Graham, J.S., Johnson, R.C., and Marko, J.F. (2011). Concentration-dependent exchange accelerates turnover of proteins bound to double-stranded DNA. *Nucleic Acids Res.* 39, 2249–2259.

Gray, W.T., Govers, S.K., Xiang, Y., Parry, B.R., Campos, M., Kim, S., and Jacobs-Wagner, C. (2019). Nucleoid Size Scaling and Intracellular Organization of Translation across Bacteria. *Cell* *177*, 1632-1648.e20.

Gruber, S. (2014). Multilayer chromosome organization through DNA bending, bridging and extrusion. *Curr. Opin. Microbiol.* *22*, 102–110.

Halford, S.E., and Marko, J.F. (2004). How do site-specific DNA-binding proteins find their targets? *Nucleic Acids Res.* *32*, 3040–3052.

Hammar, P., Leroy, P., Mahmutovic, A., Marklund, E.G., Berg, O.G., and Elf, J. (2012). The lac repressor displays facilitated diffusion in living cells. *Science* *336*, 1595–1598.

Hasnain, S., McClendon, C.L., Hsu, M.T., Jacobson, M.P., and Bandyopadhyay, P. (2014). A new coarse-grained model for *E. coli* cytoplasm: accurate calculation of the diffusion coefficient of proteins and observation of anomalous diffusion. *PLoS ONE* *9*, e106466.

Hippel, P.H. von, and Berg, O.G. (1989). Facilitated target location in biological systems. *J. Biol. Chem.* *264*, 675–678.

Hu, Z., Gogol, E.P., and Lutkenhaus, J. (2002). Dynamic assembly of MinD on phospholipid vesicles regulated by ATP and MinE. *Proc. Natl. Acad. Sci. U.S.A.* *99*, 6761–6766.

Joyce, C.M., and Steitz, T.A. (1994). Function and structure relationships in DNA polymerases. *Annu. Rev. Biochem.* *63*, 777–822.

Kalodimos, C.G., Biris, N., Bonvin, A.M.J.J., Levandoski, M.M., Guennegues, M., Boelens, R., and Kaptein, R. (2004). Structure and Flexibility Adaptation in Nonspecific and Specific Protein-DNA Complexes. *Science* *305*, 386–389.

Kalwarczyk, T., Tabaka, M., and Holyst, R. (2012). Biologistics--diffusion coefficients for complete proteome of *Escherichia coli*. *Bioinformatics* *28*, 2971–2978.

Kao-Huang, Y., Revzin, A., Butler, A.P., O’Conner, P., Noble, D.W., and von Hippel, P.H. (1977). Nonspecific DNA binding of genome-regulating proteins as a biological control mechanism: measurement of DNA-bound *Escherichia coli* lac repressor in vivo. *Proc. Natl. Acad. Sci. U.S.A.* *74*, 4228–4232.

Kapanidis, A.N., Uphoff, S., and Stracy, M. (2018). Understanding Protein Mobility in Bacteria by Tracking Single Molecules. *J. Mol. Biol.* *430*, 4443–4455.

Katayama, T., Takata, M., and Sekimizu, K. (1996). The nucleoid protein H-NS facilitates chromosome DNA replication in *Escherichia coli* dnaA mutants. *J. Bacteriol.* *178*, 5790–5792.

Konopka, M.C., Shkel, I.A., Cayley, S., Record, M.T., and Weisshaar, J.C. (2006). Crowding and confinement effects on protein diffusion in vivo. *J. Bacteriol.* *188*, 6115–6123.

Kumar, M., Mommer, M.S., and Sourjik, V. (2010). Mobility of cytoplasmic, membrane, and DNA-binding proteins in *Escherichia coli*. *Biophys. J.* *98*, 552–559.

Kuznetsova, I.M., Turoverov, K.K., and Uversky, V.N. (2014). What macromolecular crowding can do to a protein. *Int J Mol Sci* *15*, 23090–23140.

Landgraf, D., Okumus, B., Chien, P., Baker, T.A., and Paulsson, J. (2012). Segregation of molecules at cell division reveals native protein localization. *Nat. Methods* *9*, 480–482.

Le Gall, A., Cattoni, D.I., and Nollmann, M. (2017). Imaging of Bacterial Chromosome Organization by 3D Super-Resolution Microscopy. *Methods Mol. Biol.* *1624*, 253–268.

Lepore, A., Taylor, H., Landgraf, D., Okumus, B., Jaramillo-Riveri, S., McLaren, L., Bakshi, S., Paulsson, J., and Karoui, M.E. (2019). Quantification of very low-abundant proteins in bacteria using the HaloTag and epi-fluorescence microscopy. *Sci Rep* *9*, 1–9.

Lesterlin, C., and Duabrry, N. (2016). Investigating Bacterial Chromosome Architecture. In *Chromosome Architecture*, M.C. Leake, ed. (New York, NY: Springer New York), pp. 61–72.

Lesterlin, C., Ball, G., Schermelleh, L., and Sherratt, D.J. (2013). RecA bundles mediate homology pairing between distant sisters during DNA break repair. *Nature* *506*, 249–253.

Li, G.-W., Berg, O.G., and Elf, J. (2009). Effects of macromolecular crowding and DNA looping on gene regulation kinetics. *Nature Physics* *5*, 294–297.

Li, Y., Schroeder, J.W., Simmons, L.A., and Biteen, J.S. (2018). Visualizing bacterial DNA replication and repair with molecular resolution. *Curr. Opin. Microbiol.* *43*, 38–45.

Lindner, A.B., Madden, R., Demarez, A., Stewart, E.J., and Taddei, F. (2008). Asymmetric segregation of protein aggregates is associated with cellular aging and rejuvenation. *Proc. Natl. Acad. Sci. U.S.A.* *105*, 3076–3081.

Loparo, J.J., Kulczyk, A.W., Richardson, C.C., and van Oijen, A.M. (2011). Simultaneous single-molecule measurements of phage T7 replisome composition and function reveal the mechanism of polymerase exchange. *Proc. Natl. Acad. Sci. U.S.A.* *108*, 3584–3589.

Lutkenhaus, J. (2007). Assembly dynamics of the bacterial MinCDE system and spatial regulation of the Z ring. *Annu. Rev. Biochem.* *76*, 539–562.

MacDiarmid, J.A., Mugridge, N.B., Weiss, J.C., Phillips, L., Burn, A.L., Paulin, R.P., Haasdyk, J.E., Dickson, K.-A., Brahmabhatt, V.N., Pattison, S.T., et al. (2007). Bacterially derived 400 nm particles for encapsulation and cancer cell targeting of chemotherapeutics. *Cancer Cell* *11*, 431–445.

Manley, S., Gillette, J.M., Patterson, G.H., Shroff, H., Hess, H.F., Betzig, E., and Lippincott-Schwartz, J. (2008). High-density mapping of single-molecule trajectories with photoactivated localization microscopy. *Nat. Methods* *5*, 155–157.

Marklund, E., van Oosten, B., Mao, G., Amselem, E., Kipper, K., Sabantsev, A., Emmerich, A., Globisch, D., Zheng, X., Lehmann, L.C., et al. (2020). DNA surface exploration and operator bypassing during target search. *Nature*.

Meddows, T.R., Savory, A.P., and Lloyd, R.G. (2004). RecG helicase promotes DNA double-strand break repair. *Mol. Microbiol.* *52*, 119–132.

Michalet, X., and Berglund, A.J. (2012). Optimal diffusion coefficient estimation in single-particle tracking. *Phys Rev E Stat Nonlin Soft Matter Phys* *85*, 061916.

Mika, J.T., and Poolman, B. (2011). Macromolecule diffusion and confinement in prokaryotic cells. *Curr. Opin. Biotechnol.* *22*, 117–126.

Mika, J.T., Bogaart, G.V.D., Veenhoff, L., Krasnikov, V., and Poolman, B. (2010). Molecular sieving properties of the cytoplasm of *Escherichia coli* and consequences of osmotic stress. *Molecular Microbiology* *77*, 200–207.

- Monteilhet, C., Perrin, A., Thierry, A., Colleaux, L., and Dujon, B. (1990). Purification and characterization of the in vitro activity of I-Sce I, a novel and highly specific endonuclease encoded by a group I intron. *Nucleic Acids Res.* *18*, 1407–1413.
- Mullineaux, C.W., Nenninger, A., Ray, N., and Robinson, C. (2006). Diffusion of green fluorescent protein in three cell environments in *Escherichia coli*. *J. Bacteriol.* *188*, 3442–3448.
- Nandakumar, J., Nair, P.A., and Shuman, S. (2007). Last stop on the road to repair: structure of *E. coli* DNA ligase bound to nicked DNA-adenylate. *Mol. Cell* *26*, 257–271.
- Nenninger, A., Mastroianni, G., and Mullineaux, C.W. (2010). Size dependence of protein diffusion in the cytoplasm of *Escherichia coli*. *J. Bacteriol.* *192*, 4535–4540.
- Niu, L., and Yu, J. (2008). Investigating Intracellular Dynamics of FtsZ Cytoskeleton with Photoactivation Single-Molecule Tracking. *Biophys J* *95*, 2009–2016.
- Nolivos, S., Upton, A.L., Badrinarayanan, A., Müller, J., Zawadzka, K., Wiktor, J., Gill, A., Arciszewska, L., Nicolas, E., and Sherratt, D. (2016). MatP regulates the coordinated action of topoisomerase IV and MukBEF in chromosome segregation. *Nature Communications* *7*.
- Nolivos, S., Cayron, J., Dedieu, A., Page, A., Delolme, F., and Lesterlin, C. (2019). Role of AcrAB-TolC multidrug efflux pump in drug-resistance acquisition by plasmid transfer. *Science* *364*, 778–782.
- Normanno, D., Boudarène, L., Dugast-Darzacq, C., Chen, J., Richter, C., Proux, F., Bénichou, O., Voituriez, R., Darzacq, X., and Dahan, M. (2015). Probing the target search of DNA-binding proteins in mammalian cells using TetR as model searcher. *Nat Commun* *6*, 7357.
- Parry, B.R., Surovtsev, I.V., Cabeen, M.T., O’Hern, C.S., Dufresne, E.R., and Jacobs-Wagner, C. (2014). The bacterial cytoplasm has glass-like properties and is fluidized by metabolic activity. *Cell* *156*, 183–194.
- Ramadurai, S., Holt, A., Krasnikov, V., van den Bogaart, G., Killian, J.A., and Poolman, B. (2009). Lateral diffusion of membrane proteins. *J. Am. Chem. Soc.* *131*, 12650–12656.
- Rampley, C.P.N., Davison, P.A., Qian, P., Preston, G.M., Hunter, C.N., Thompson, I.P., Wu, L.J., and Huang, W.E. (2017). Development of SimCells as a novel chassis for functional biosensors. *Sci Rep* *7*, 7261.
- Raskin, D.M., and de Boer, P.A.J. (1999). Rapid pole-to-pole oscillation of a protein required for directing division to the middle of *Escherichia coli*. *Proc Natl Acad Sci USA* *96*, 4971.
- Redding, S., and Greene, E.C. (2013). How do proteins locate specific targets in DNA? *Chemical Physics Letters* *570*.
- Reece, R.J., and Maxwell, A. (1991). DNA gyrase: structure and function. *Crit. Rev. Biochem. Mol. Biol.* *26*, 335–375.
- Reyes-Lamothe, R., Nicolas, E., and Sherratt, D.J. (2012). Chromosome replication and segregation in bacteria. *Annu. Rev. Genet.* *46*, 121–143.
- Rhodes, J., Mazza, D., Nasmyth, K., and Uphoff, S. (2017). Scc2/Nipbl hops between chromosomal cohesin rings after loading. *Elife* *6*.

Ross, W., and Gourse, R.L. (2005). Sequence-independent upstream DNA-alphaCTD interactions strongly stimulate Escherichia coli RNA polymerase-lacUV5 promoter association. *Proc. Natl. Acad. Sci. U.S.A.* *102*, 291–296.

Rybenkov, V.V., Herrera, V., Petrushenko, Z.M., and Zhao, H. (2014). MukBEF, a chromosomal organizer. *J. Mol. Microbiol. Biotechnol.* *24*, 371–383.

Sanamrad, A., Persson, F., Lundius, E.G., Fange, D., Gynnå, A.H., and Elf, J. (2014). Single-particle tracking reveals that free ribosomal subunits are not excluded from the Escherichia coli nucleoid. *Proc. Natl. Acad. Sci. U.S.A.* *111*, 11413–11418.

Schavemaker, P.E., Śmigiel, W.M., and Poolman, B. (2017). Ribosome surface properties may impose limits on the nature of the cytoplasmic proteome. *Elife* *6*.

Schavemaker, P.E., Boersma, A.J., and Poolman, B. (2018). How Important Is Protein Diffusion in Prokaryotes? *Front Mol Biosci* *5*, 93.

Shepherd, N., Dennis, P., and Bremer, H. (2001). Cytoplasmic RNA Polymerase in Escherichia coli. *Journal of Bacteriology* *183*, 2527–2534.

Shuman, S. (2009). DNA Ligases: Progress and Prospects. *The Journal of Biological Chemistry* *284*, 17365.

Siegele, D.A., and Hu, J.C. (1997). Gene expression from plasmids containing the araBAD promoter at subsaturating inducer concentrations represents mixed populations. *Proc. Natl. Acad. Sci. U.S.A.* *94*, 8168–8172.

Skarstad, K., and Boye, E. (1993). Degradation of individual chromosomes in recA mutants of Escherichia coli. *Journal of Bacteriology* *175*, 5505.

Sliusarenko, O., Heinritz, J., Emonet, T., and Jacobs-Wagner, C. (2011). High-throughput, subpixel-precision analysis of bacterial morphogenesis and intracellular spatio-temporal dynamics. *Molecular Microbiology* *80*, 612.

Stracy, M., Lesterlin, C., Leon, F.G. de, Uphoff, S., Zawadzki, P., and Kapanidis, A.N. (2015). Live-cell superresolution microscopy reveals the organization of RNA polymerase in the bacterial nucleoid. *PNAS* *112*, E4390–E4399.

Stracy, M., Jaciuk, M., Uphoff, S., Kapanidis, A.N., Nowotny, M., Sherratt, D.J., and Zawadzki, P. (2016). Single-molecule imaging of UvrA and UvrB recruitment to DNA lesions in living Escherichia coli. *Nature Communications* *7*, 12568.

Stracy, M., Wollman, A.J.M., Kaja, E., Gapinski, J., Lee, J.-E., Leek, V.A., McKie, S.J., Mitchenall, L.A., Maxwell, A., Sherratt, D.J., et al. (2019). Single-molecule imaging of DNA gyrase activity in living Escherichia coli. *Nucleic Acids Res* *47*, 210–220.

Stylianidou, S., Kuwada, N.J., and Wiggins, P.A. (2014). Cytoplasmic Dynamics Reveals Two Modes of Nucleoid-Dependent Mobility. *Biophys J* *107*, 2684–2692.

Subach, F.V., Patterson, G.H., Manley, S., Gillette, J.M., Lippincott-Schwartz, J., and Verkhusha, V.V. (2009). Photoactivatable mCherry for high-resolution two-color fluorescence microscopy. *Nat. Methods* *6*, 153–159.

Tokunaga, M., Imamoto, N., and Sakata-Sogawa, K. (2008). Highly inclined thin illumination enables clear single-molecule imaging in cells. *Nat. Methods* *5*, 159–161.

Uphoff, S. (2016). Super-Resolution Microscopy and Tracking of DNA-Binding Proteins in Bacterial Cells. *Methods Mol. Biol.* *1431*, 221–234.

Uphoff, S., and Sherratt, D.J. (2017). Single-Molecule Analysis of Bacterial DNA Repair and Mutagenesis. *Annu Rev Biophys* *46*, 411–432.

Uphoff, S., Reyes-Lamothe, R., de Leon, F.G., Sherratt, D.J., and Kapanidis, A.N. (2013). Single-molecule DNA repair in live bacteria. *Proceedings of the National Academy of Sciences* *110*, 8063–8068.

Uphoff, S., Sherratt, D.J., and Kapanidis, A.N. (2014). Visualizing Protein-DNA Interactions in Live Bacterial Cells Using Photoactivated Single-molecule Tracking. *J Vis Exp*.

Uphoff, S., Lord, N.D., Okumus, B., Potvin-Trottier, L., Sherratt, D.J., and Paulsson, J. (2016). Stochastic activation of a DNA damage response causes cell-to-cell mutation rate variation. *Science* *351*, 1094–1097.

van der Valk, R.A., Vreede, J., Qin, L., Moolenaar, G.F., Hofmann, A., Goosen, N., and Dame, R.T. (2017). Mechanism of environmentally driven conformational changes that modulate H-NS DNA-bridging activity. *Elife* *6*.

Vrljic, M., Nishimura, S.Y., Brasselet, S., Moerner, W.E., and McConnell, H.M. (2002). Translational diffusion of individual class II MHC membrane proteins in cells. *Biophys J* *83*, 2681–2692.

Wang, X., Possoz, C., and Sherratt, D.J. (2005). Dancing around the divisome: asymmetric chromosome segregation in *Escherichia coli*. *Genes Dev.* *19*, 2367–2377.

Wegel, E., Göhler, A., Lagerholm, B.C., Wainman, A., Uphoff, S., Kaufmann, R., and Dobbie, I.M. (2016). Imaging cellular structures in super-resolution with SIM, STED and Localisation Microscopy: A practical comparison. *Sci Rep* *6*, 27290.

Willets, N.S., and Clark, A.J. (1969). Characteristics of Some Multiply Recombination-Deficient Strains of *Escherichia coli*. *Journal of Bacteriology* *100*, 231.

Zandarashvili, L., Esadze, A., Vuzman, D., Kemme, C.A., Levy, Y., and Iwahara, J. (2015). Balancing between affinity and speed in target DNA search by zinc-finger proteins via modulation of dynamic conformational ensemble. *Proc. Natl. Acad. Sci. U.S.A.* *112*, E5142-5149.

Zawadzki, P., Stracy, M., Ginda, K., Zawadzka, K., Lesterlin, C., Kapanidis, A.N., and Sherratt, D.J. (2015). The Localization and Action of Topoisomerase IV in *Escherichia coli* Chromosome Segregation Is Coordinated by the SMC Complex, MukBEF. *Cell Reports* *13*, 2587–2596.

## ACKNOWLEDGMENTS:

The authors thank Sophie Nolivos for providing pSN1 plasmid; **Funding:** M.S. was funded by a Sir Henry Wellcome Fellowship (204684/Z/16/Z) and a Junior Research Fellowship at Trinity College Oxford. S.U. was funded by Sir Henry Wellcome (101636/Z/13/Z) and Sir Henry Dale Fellowships (206159/Z/17/Z), a Wellcome-Beit Prize (206159/Z/17/B), and a Hugh Price Fellowship at Jesus College, Oxford. C. L. acknowledges the ATIP-Avenir and FINOVI (AO-2014); the Schlumberger Foundation for Education and Research (FSER2019). D.J.S. was funded by a Wellcome Investigator Award (200782/Z/16/Z). A.N.K. was supported by Wellcome Trust grant 110164/Z/15/Z, European

Council Grant 261227, and the UK Biotechnology and Biological Sciences Research Council grants BB/N018656/1 and BB/S008896/1. **Author contributions:** M.S., S.U. and C.L. conceived the project, designed the study and wrote the paper with equal contributions; M.S., S.U, J.S. and C.L. performed the experiments and analyzed the data. M.S., S.U., D.J.S., A.K. and C.L. provided funding and gave intellectual input throughout the project. **Competing interests:** The authors declare no competing interests. **Data and materials availability:** Raw data is available from Mendeley Data. Materials are available from the corresponding authors upon request.

### SUPPLEMENTARY FIGURES:

**Figure S1:** (A)  $D^*$  histograms and model fit of PolA-PAmCherry in cells treated with methyl methanesulfonate (MMS). (B)  $D^*$  histograms of PolA-PAmCherry in fixed cells, fitted with a model of immobile molecules only. (C) Scatter plot of experimentally determined  $D_{\text{mobile}}$  diffusion of 12 DNA-binding proteins against their intracellular copy number. The fitted  $D_{\text{mobile}}$  value extracted from a 2 species fit to the histograms of apparent diffusion coefficients,  $D^*$ , presented in Figure 1. The copy number estimates are from literature sources are presented in Table 1. (D) Distributions histograms of apparent diffusion,  $D^*$ , of three DNA-binding proteins: DNA polymerase 1 (Pol1) and RNA polymerase (RNAP) before (left) and after 60 mins treatment with 50  $\mu\text{g/ml}$  rifampicin (right). Distributions are fitted with a 2-species model of immobile (in red) and mobile molecules (in blue).

**Figure S2:** Quantification of DNA degradation efficiency. (A) Fluorescence profiles show the distribution and intensity of DAPI signal in individual cells normalized by the cell length and sorted from left to right by increasing mean intensity. Fluorescence profile of OT / pSN1(p $P_{BAD}$ -I-SceI) strain before (Top panel) and 120 min after I-SceI induction (lower panel) are shown. (B) Histograms of DAPI-stained DNA intracellular fluorescence in OT / pSN1(PBADI-SceI) cell population, before (blue bars) and 120 min after I-SceI induction (green bars). The percentages of cells below and above a DAPI content threshold (grey dash line) are shown. Before I-SceI induction, 17 % of cells already exhibit DNA loss likely due to the leakiness I-SceI expression from PBAD promoter. 120 min after arabinose-induced I-SceI expression, this proportion increases to 92 % of the population, with 8 % of cells still containing DNA (n= cells analyzed).

**Figure S3:** (A) Kymograph and concentration profiles of the fluorescence signal of MinC protein in exponentially growing *E. coli* cells. The width of the kymograph corresponds to the length  $L$  of the cell. Upon vertical splitting of the kymograph (white dashed line) and integration over space ( $x$ ), the time-dependent intensity signals  $F_{x,\text{left}}(t)$  and  $F_{x,\text{right}}(t)$  are obtained. The oscillation period  $T_2$  can be



calculated by periodic fitting (blue and green lines on the left and right of the kymograph). Upon integration over time ( $t$ ), a spatial concentration profile of the MinC proteins is obtained (black data points below the kymograph) and fitted (red curve). The depth  $D$  of the profile is calculated from the heights of the maxima and the minimum. (B) Oscillation of fluorescence over time in cell halves. When the time-dependent fluorescence is integrated, an almost perfect constant line is obtained (black curve). This is due to the normalization of the intensity of each pixel in respect to the total fluorescence signal at each time point. In consequence, the two periodic curves for the left and right kymograph halves are perfectly symmetric (blue and green curve). (C) Kymograph and concentration profiles of the fluorescence signal of MinC protein in filamentous cells. In filamentous cells, the time-averaged concentration profile can show more than two peaks. The distance between two peaks corresponds to half an intrinsic wavelength of the Min system. For the calculation of the oscillation period  $T_m$  in filamentous cells, the kymograph is split along the position of the minima  $x_{min}$  (white dashed lines in the kymograph) resulting in several stripes with a periodic pattern. Integration along  $x$  provides a periodic functions  $F_{x,i}(t)$  from which oscillation period  $T_i$  can be calculated.  $T_m$  represents the average for these multiple oscillation periods. (D) Kymographs of different filamentous cells show different number of oscillations. Most of them show only a single (cells 1, 4, 5 and 8) or double oscillation (cells 2, 3 and 7). In the given example one cells shows 14 peaks, which corresponds to 13 oscillations and thus 6.5 wavelengths. The respective wavelength can be then calculated from the length of the cell and the number of oscillations.

**Figure S4:** (A) Maintenance of protein synthesis activity upon induction of DNA degradation. Quantification of ParB-mCherry intracellular signal (a.u., arbitrary unit) produced from IPTG inducible pSN70 plasmid ( $P_{lac}$  *I-SceI*) in OT strain. *I-SceI* expression from pSN1 plasmid is induced by arabinose 0.2 %. Chromosome degradation alone has little impact on ParB-mCherry production. Over the course of the experiment (200 minutes), ParB-mCherry production is induced by IPTG with or without chromosome degradation. Error bars indicate the standard error and  $n$  = the numbers of cells analyzed. Two tailed P-values from Mann-Whitney non-parametric test are indicated by (n.s) non-significant P-value  $> 0.05$ , \* for P-value  $< 0.05$ , \*\* for P-value  $< 0.01$  and \*\*\*\* for P-value  $< 0.001$ . (B) Cumulative distribution plot of tracked MukB-PAmCherry trajectory step size in cells before and 120 mins after *I-SceI* induction. Protein diffusion remains unchanged *recA* proficient cells (*recA*<sup>+</sup>) before (magenta line) after induction (black dashed line), whereas diffusion increases after induction in *recA*<sup>-</sup> cells (blue dashed line). (C) Cumulative distribution plot of tracked Pol1-PAmCherry trajectory step size in (*recA*<sup>-</sup>) cells before and after *I-SceI* induction. Protein diffusion increases with *I-SceI* induction time from 0 to 90 mins, but increases only modestly beyond 90 mins induction.

**Figure S5:** A fraction of cells did not undergo full DNA degradation and these cells showed little change in the diffusion profiles. (A) Fluorescence image of SytoGreen stained DNA in cells after 120 mins of I-SceI induction showing DNA+ and DNA-free cells (top). The brightfield image of the same cells overlaid with the categorized trajectories of RNAP-PAmCherry tracks with immobile molecules in red and mobile molecules in blue (bottom). The lower-right insert presents a zoom of one DNA+ and one DNA-free cell. (B) Cumulative distribution of LacI-PAmCherry trajectory displacement steps in cells having high (DNA+ cells in blue) or low (DNA-free cells in red) SytoGreen fluorescence compared to the unperturbed cells (in black).

**Figure S6:**  $D^*$  distribution (grey bars) of MukB-PAmCherry, PolI-PAmCherry, LigA-PAmCherry and LacI-PAmCherry in DNA-free cells 120 min after I-SceI induction measured with an exposure time of 15 ms (left) and 5 ms (right). The  $D^*$  distribution generated from simulated molecule trajectories with the same diffusion coefficient,  $D_{free}$ , at 15 ms (left) and 5 ms (right) exposure times.

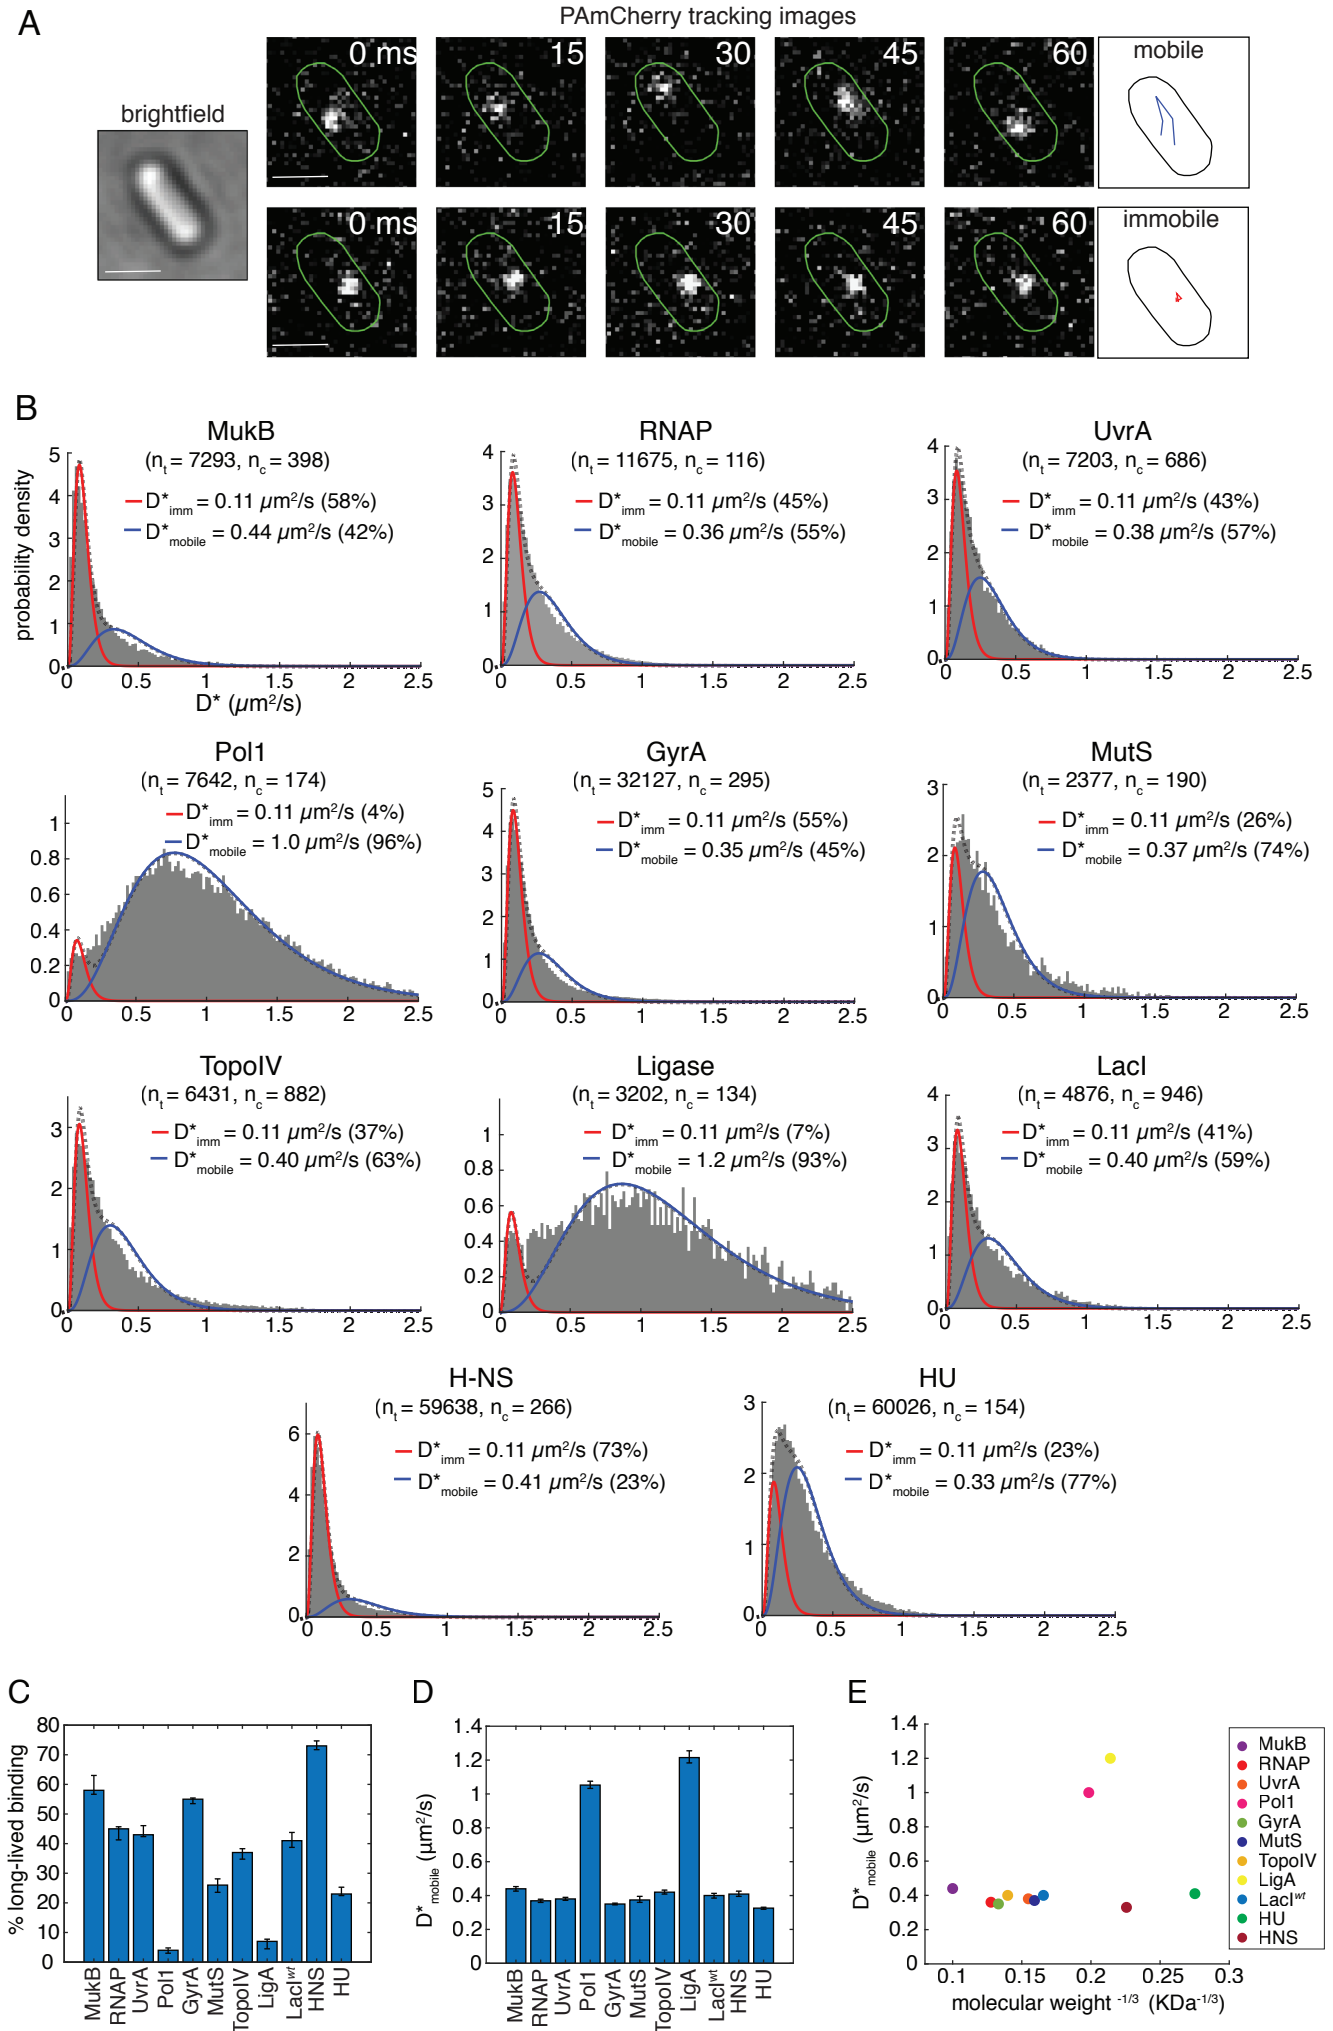

Figure 1

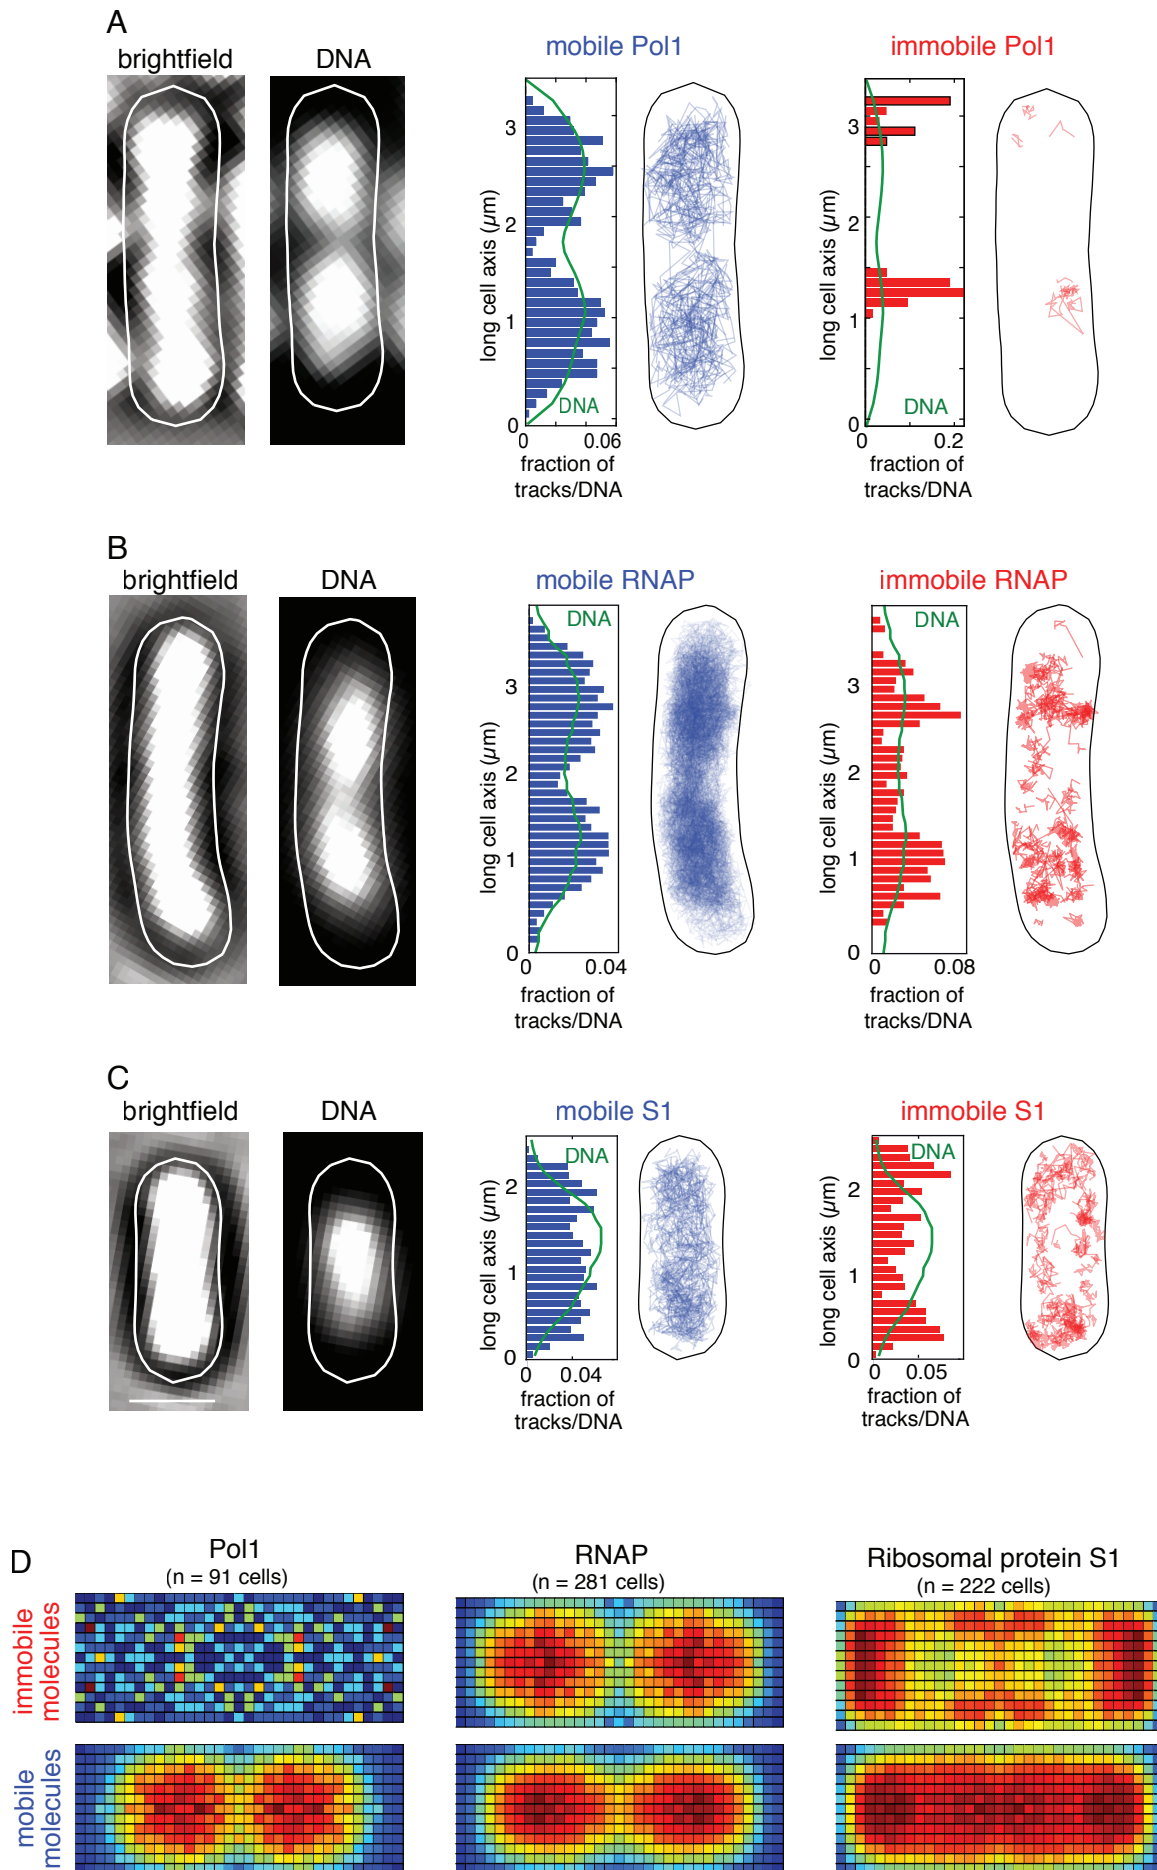

Figure 2

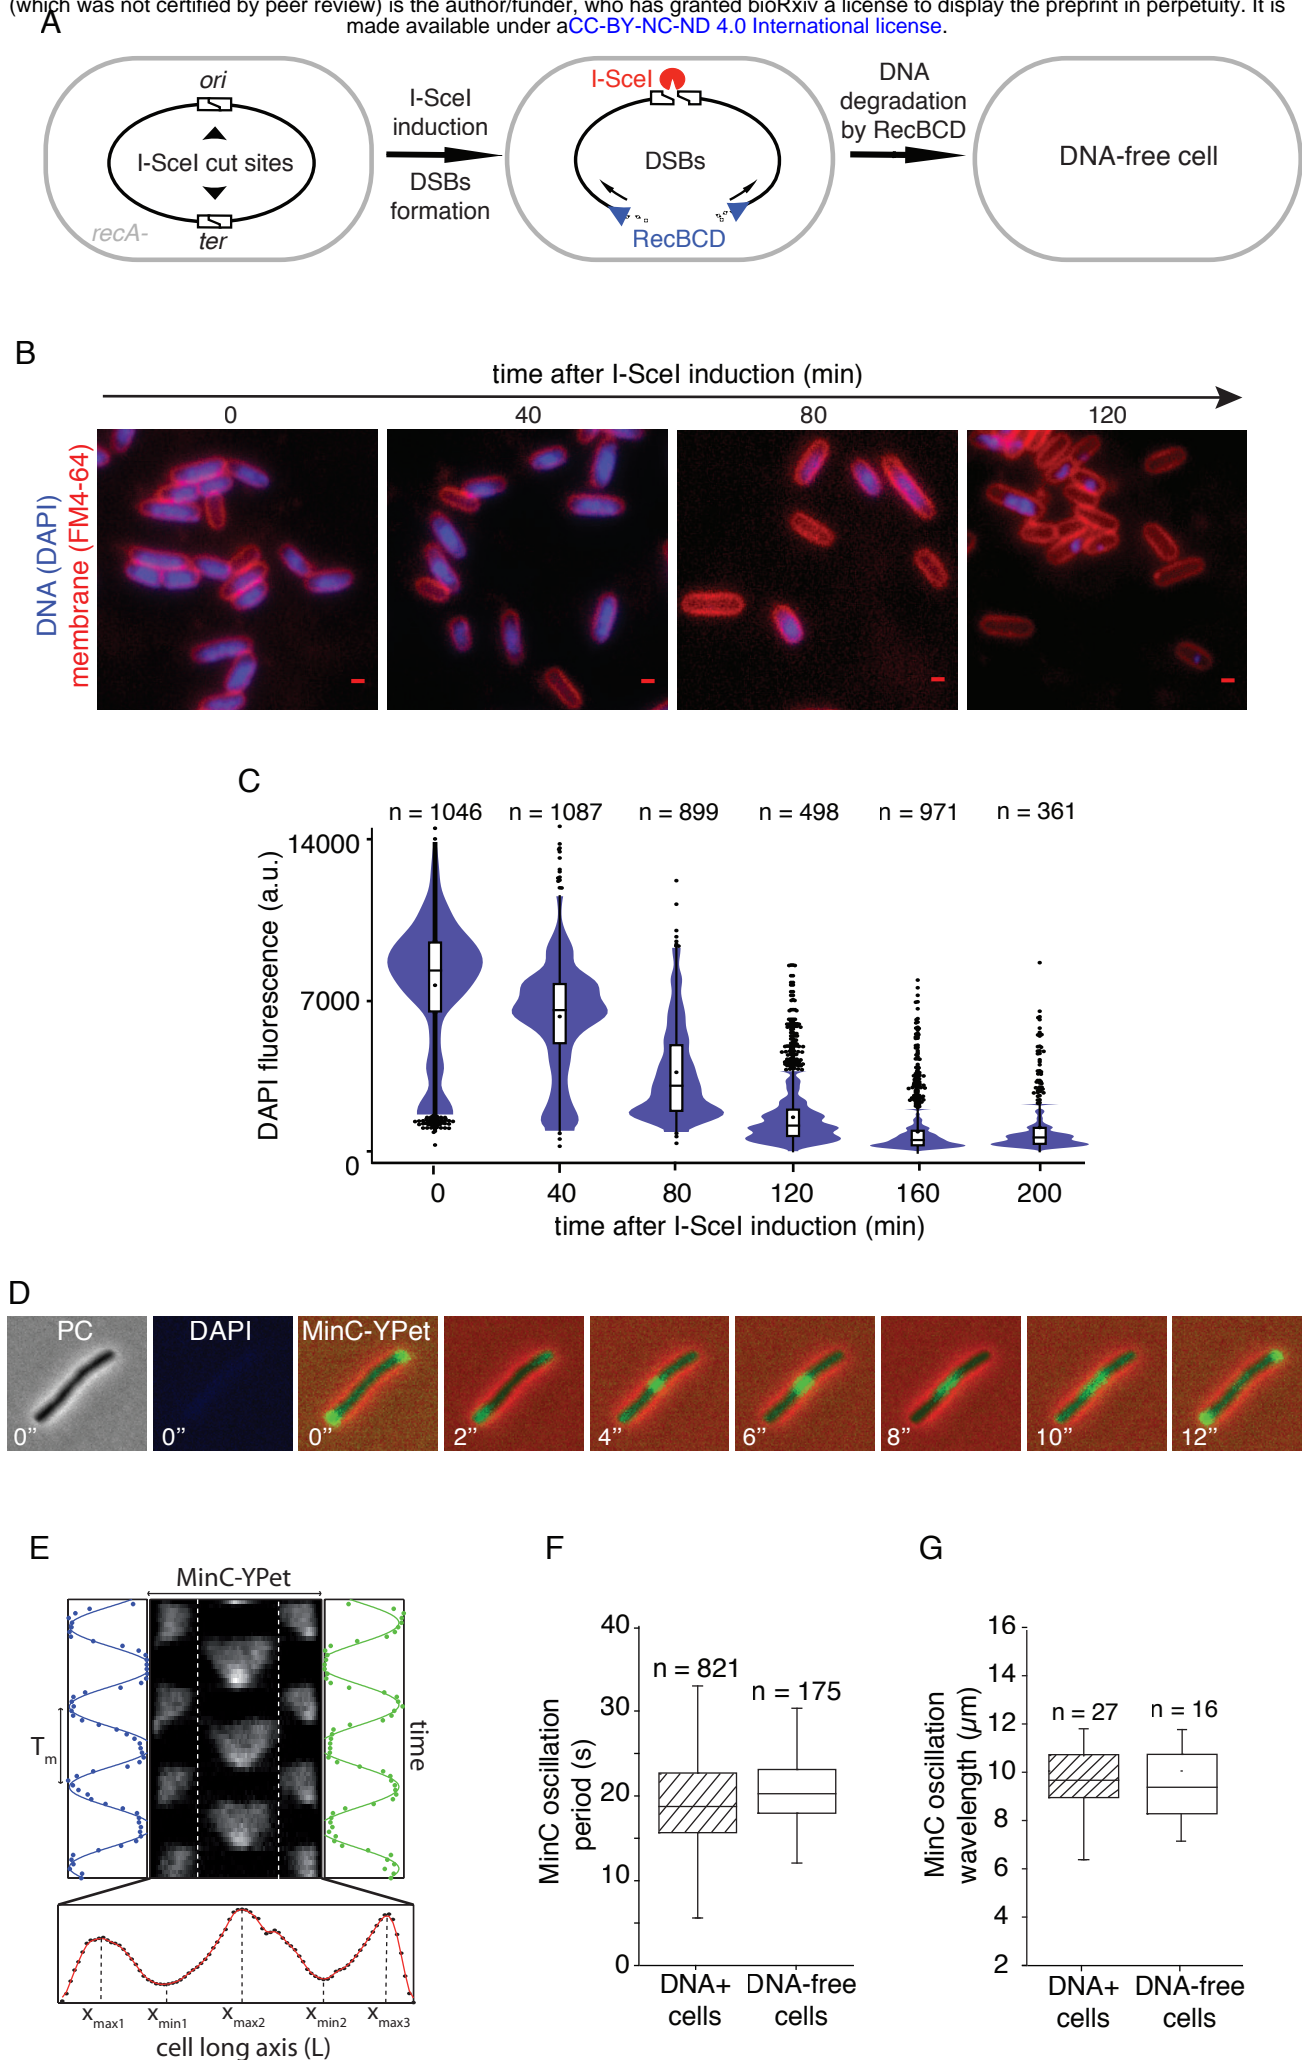

Figure 3

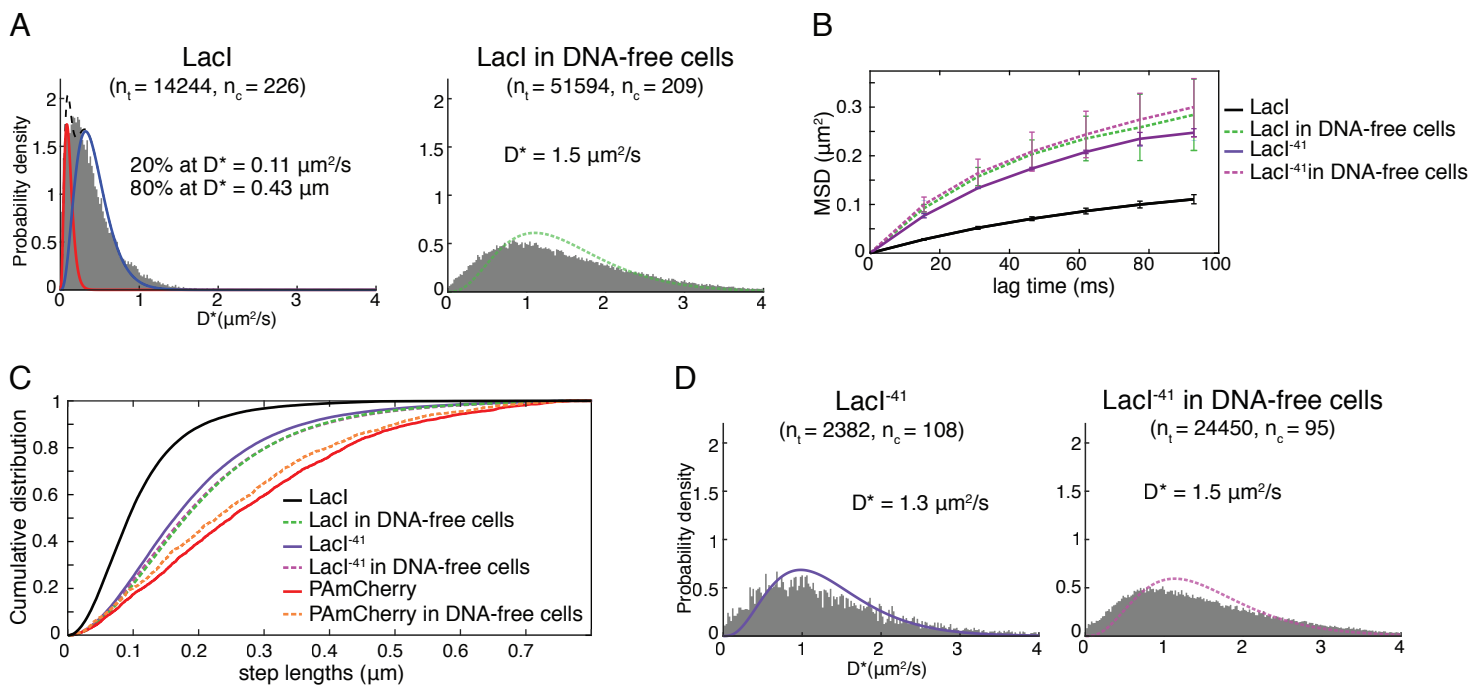

Figure 4

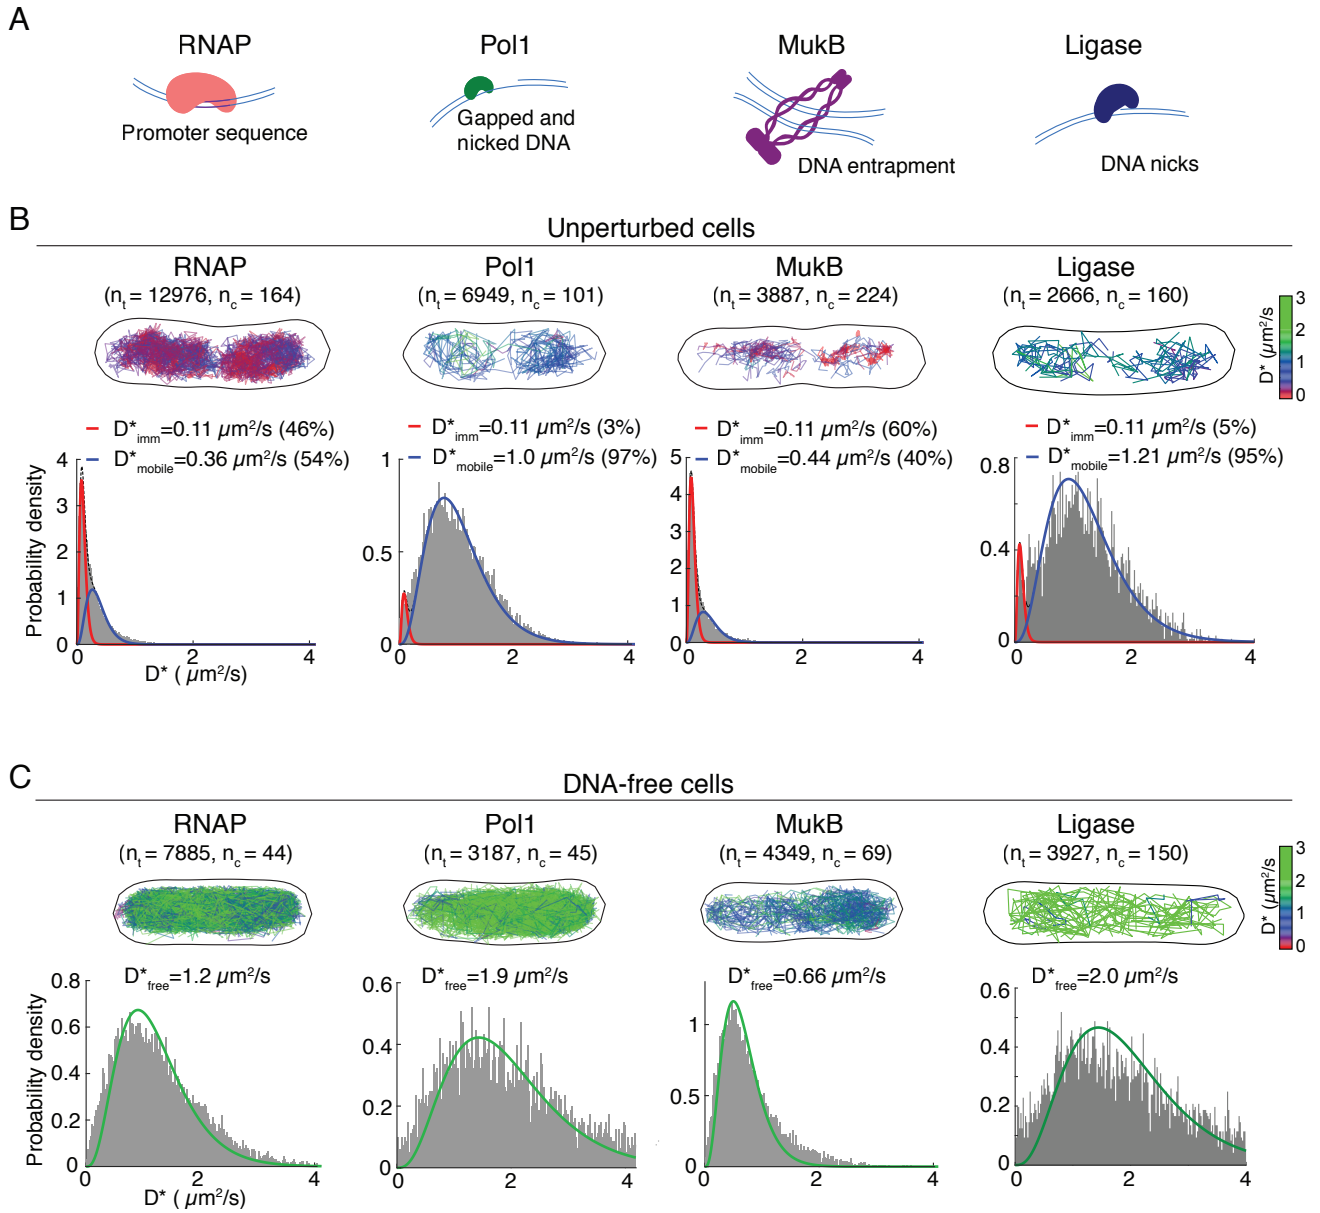

Figure 5

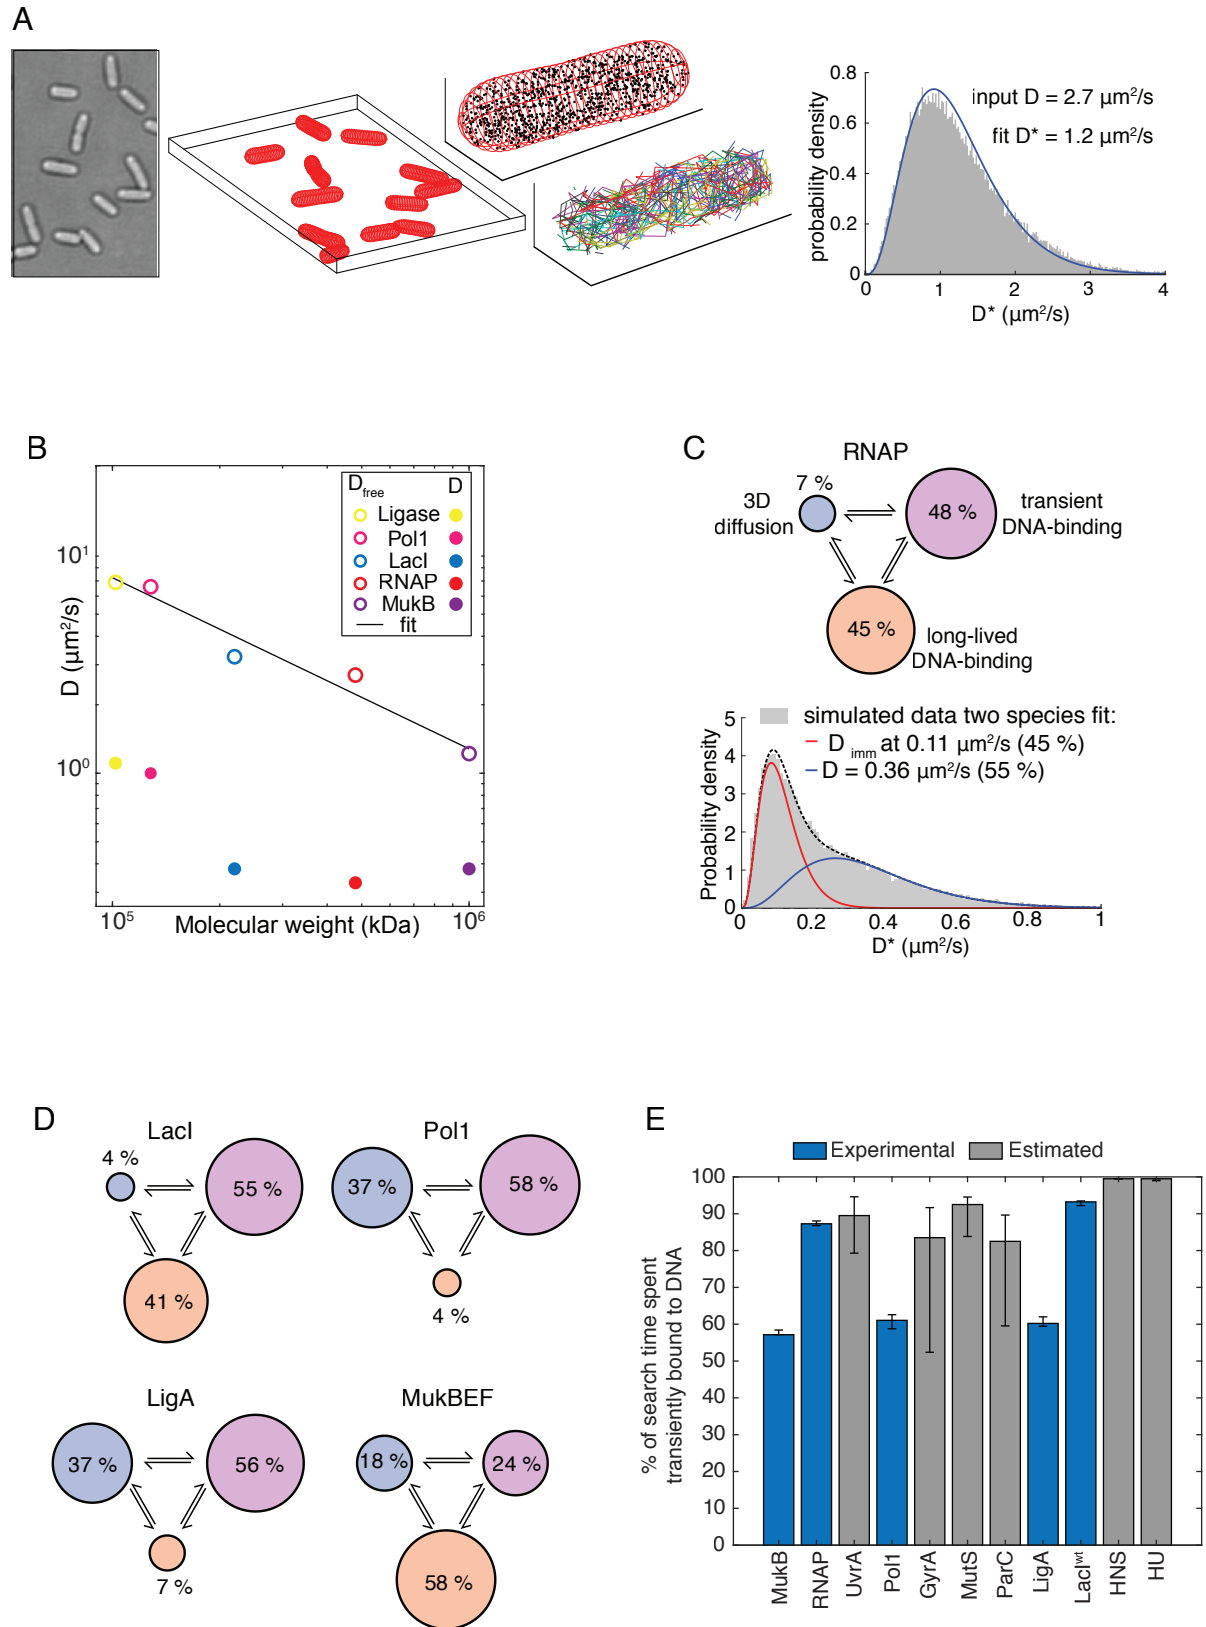

Figure 6



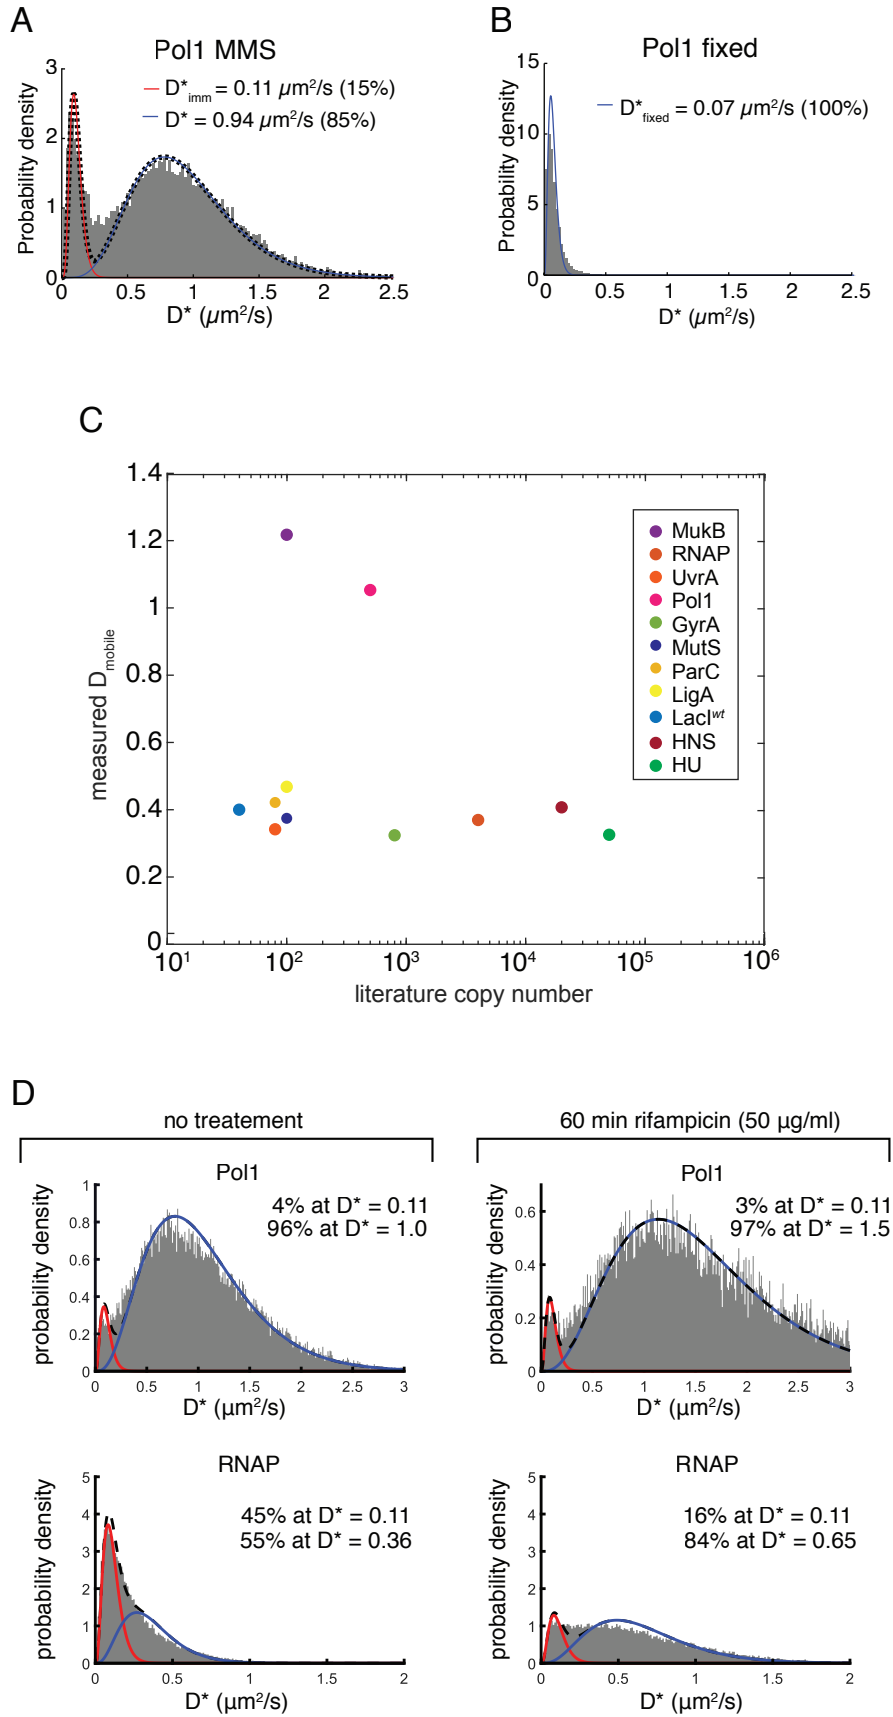

Figure S1

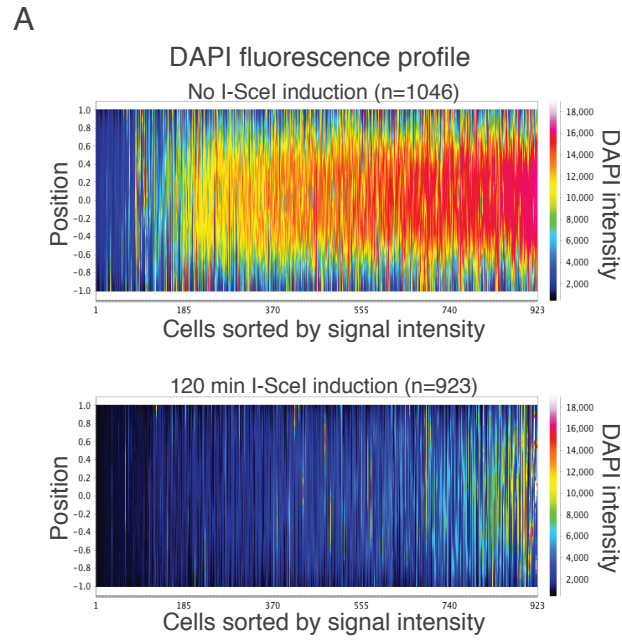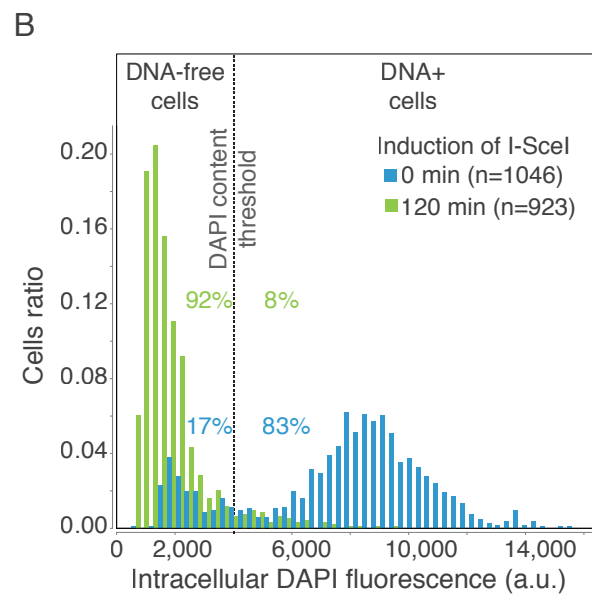

Fig. S2

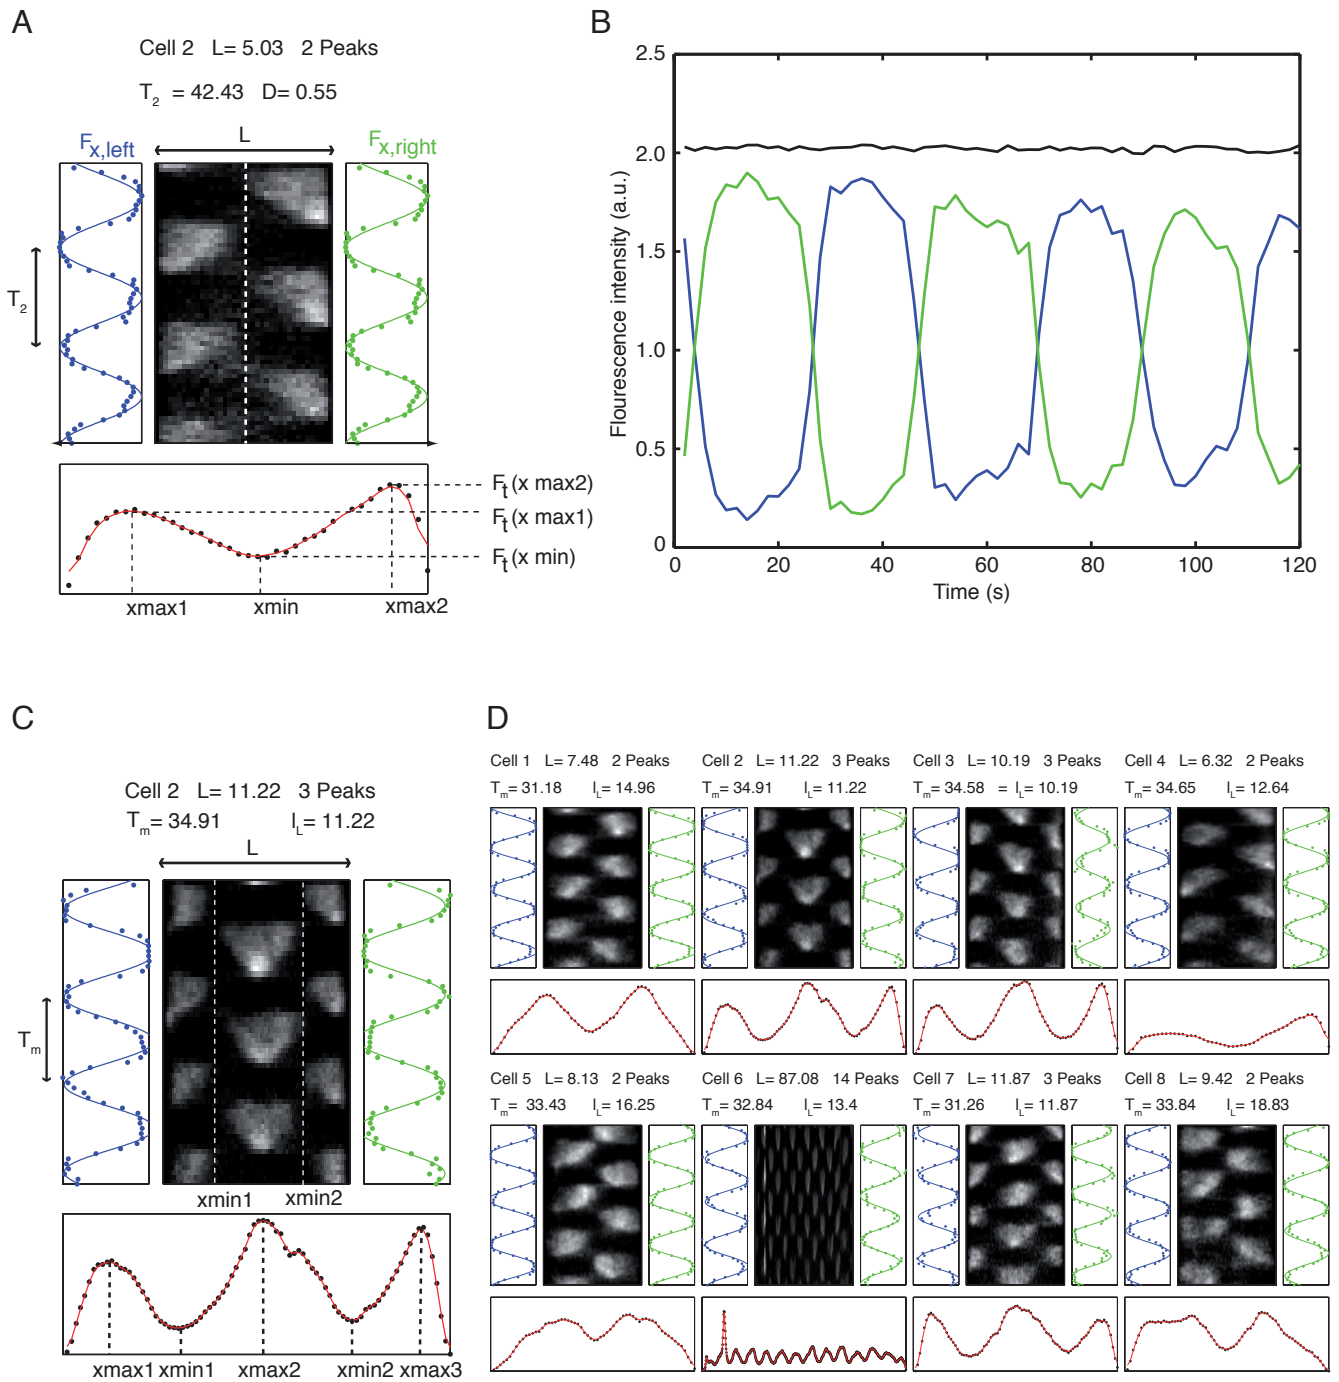

Fig. S3

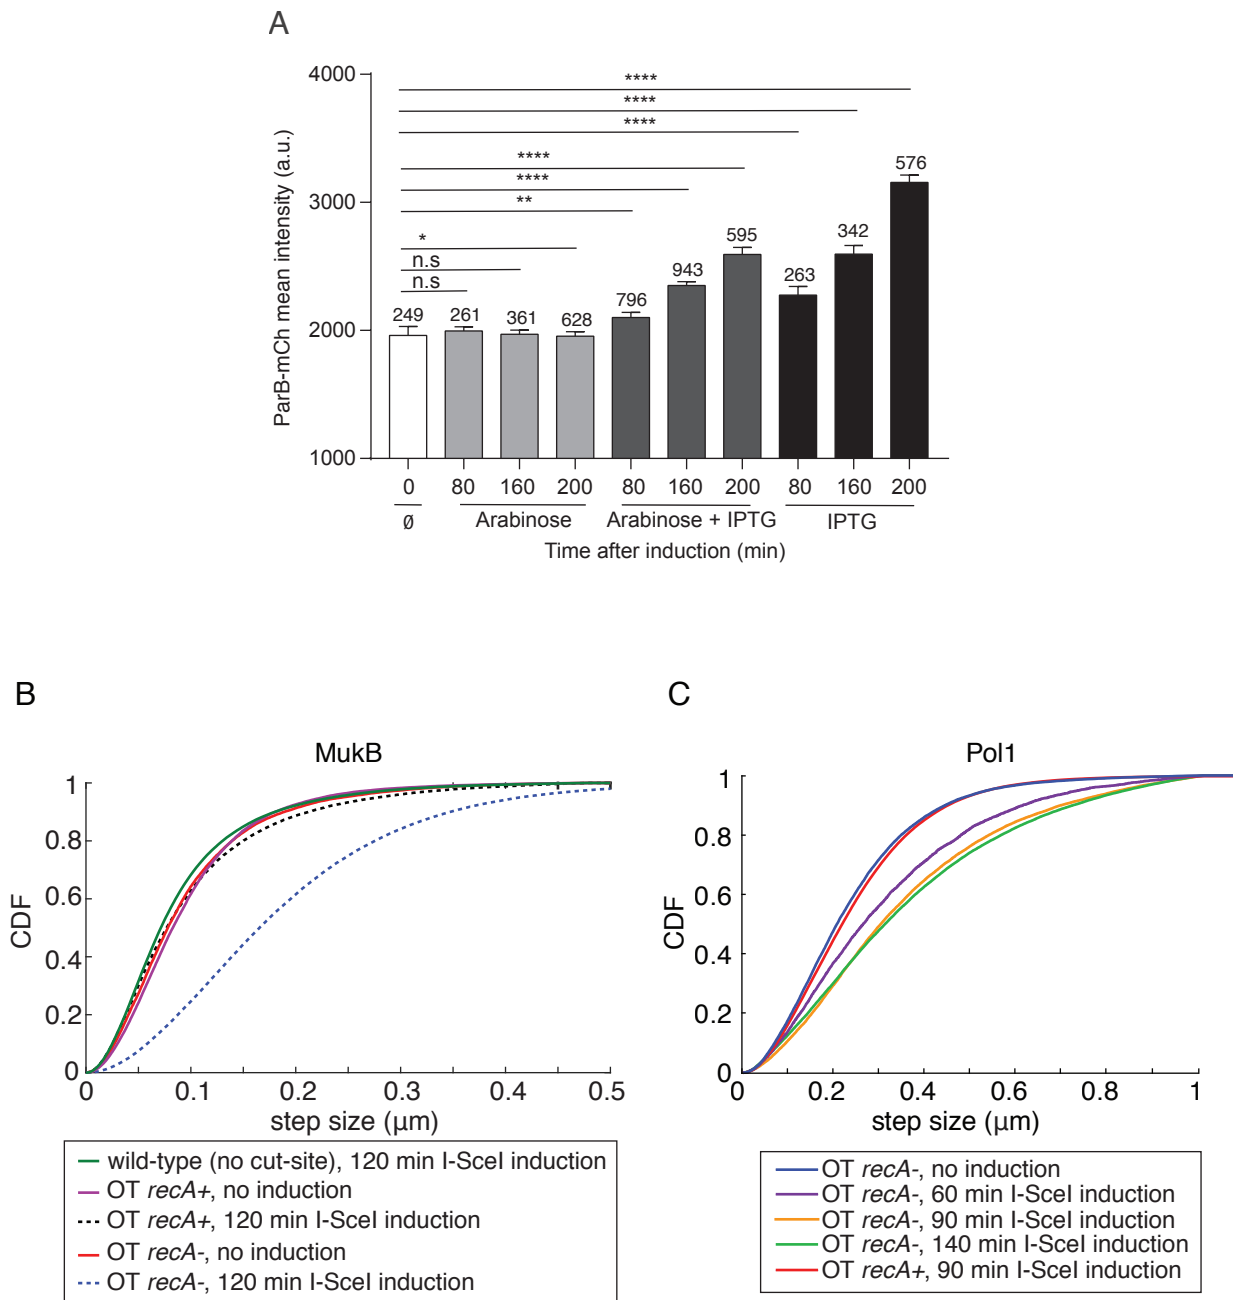

Fig. S4

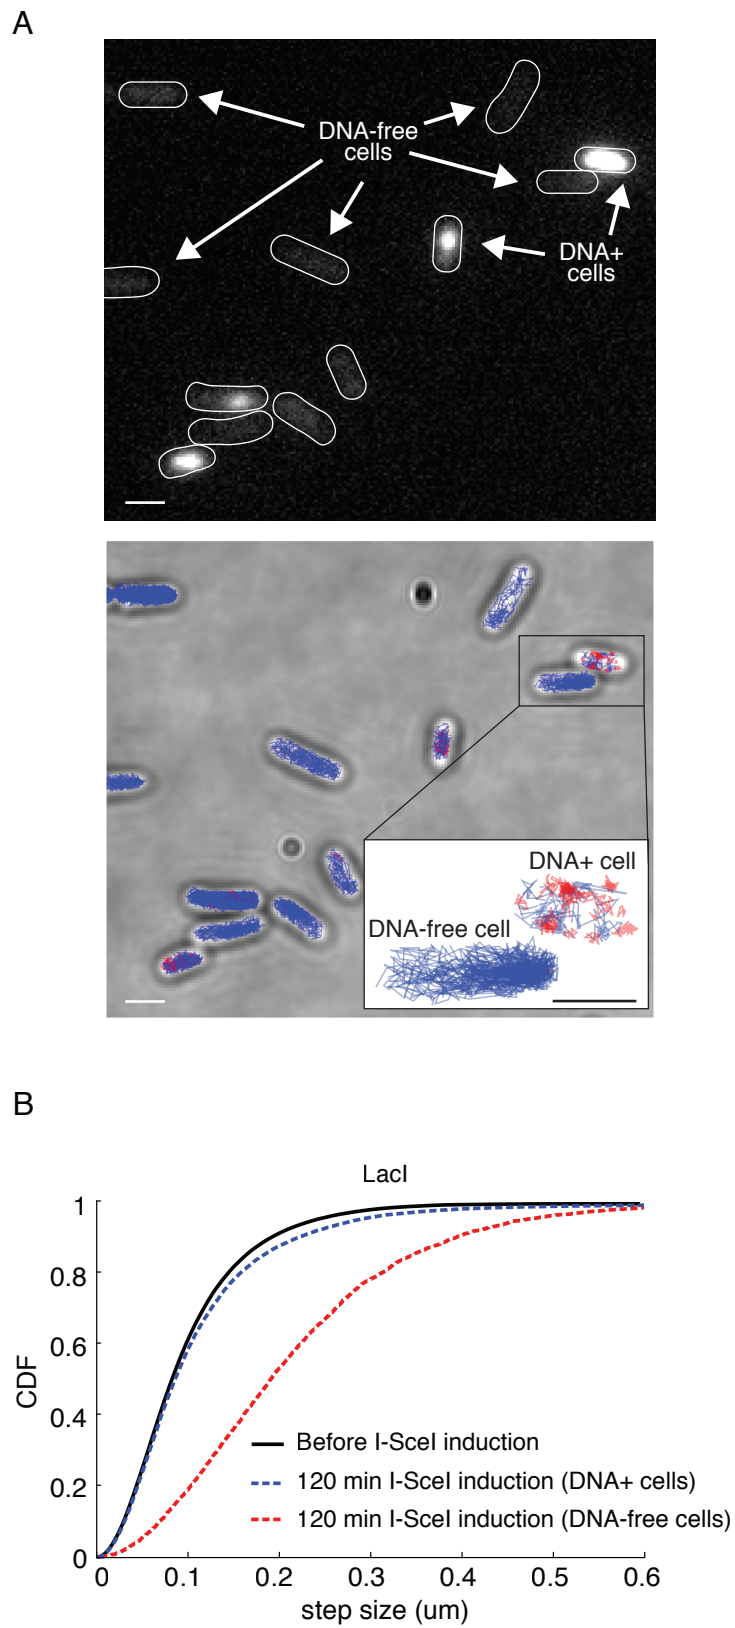

Fig. S5

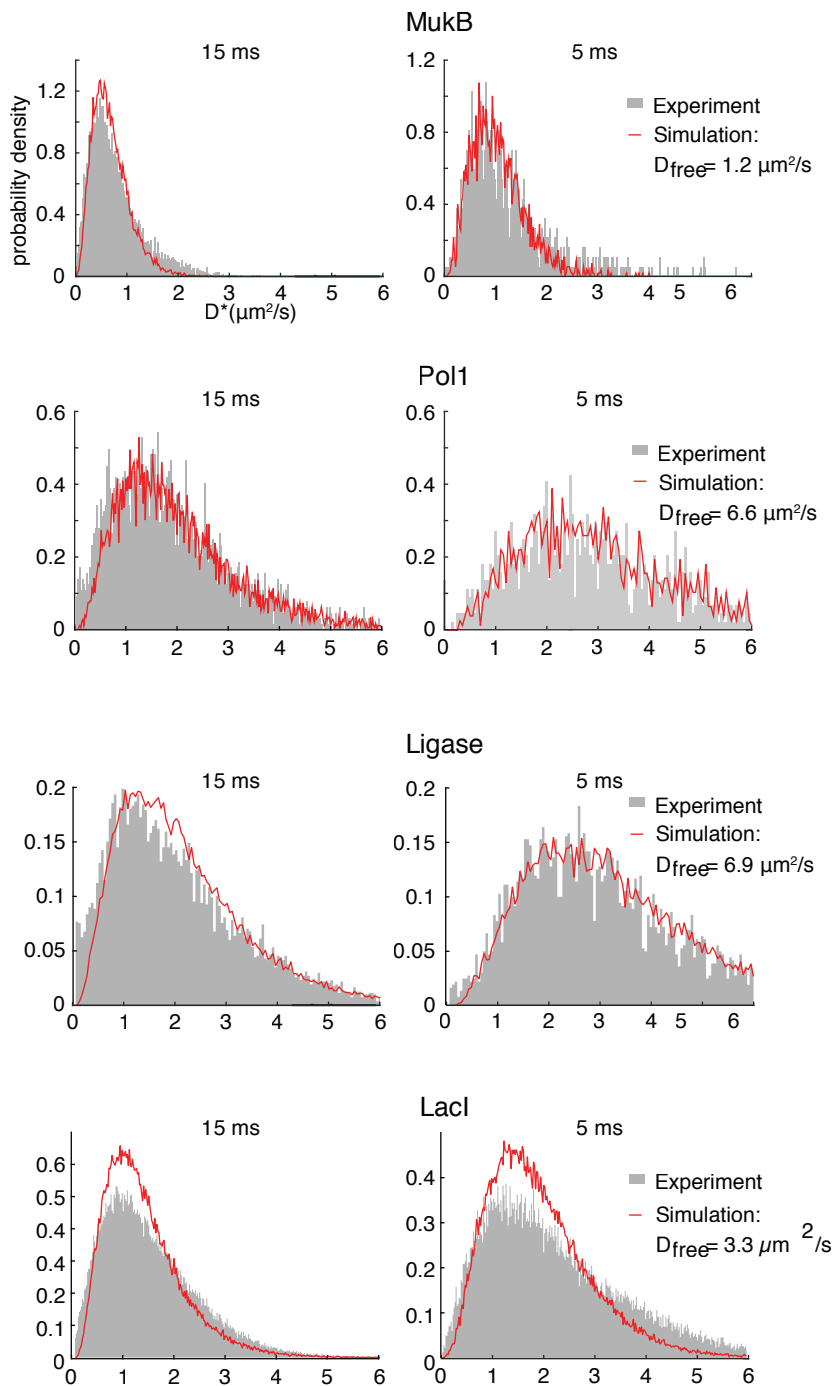

Fig. S6

Table S1 **Strains and plasmids used in this study**

| <b>Strain</b>                               | <b>Relevant Genotype</b>                                               | <b>Source or Reference</b>                                                                                                   |
|---------------------------------------------|------------------------------------------------------------------------|------------------------------------------------------------------------------------------------------------------------------|
| <b>MG1655</b>                               | F- lambda- <i>ilvG- rfb-50 rph-1</i>                                   | CGSC#: 7740                                                                                                                  |
| <b>TB28</b>                                 | MG1655 $\Delta$ <i>lacIZYA</i>                                         | Bernhardt and de Boer, 2005                                                                                                  |
| <b>TB28 <i>I-SceI<sup>CS</sup>-ilvA</i></b> | TB28 <i>I-SceI<sup>CS</sup>-ilvA-FRT</i> (3953 kb)                     | TB28 × P1. <i>I-SceI<sup>CS</sup>-ilvA</i> to Cm <sup>r</sup> , <i>cat</i> removed via pCP20                                 |
| <b>TB28 <i>I-SceI<sup>CS</sup>-ydeO</i></b> | TB28 <i>I-SceI<sup>CS</sup>-ydeO-FRT-cat-FRT</i> (1580 kb)             | TB28 × P1. <i>I-SceI<sup>CS</sup>-ydeO</i> to Cm <sup>r</sup>                                                                |
| <b>OT</b>                                   | TB28 <i>I-SceI<sup>CS</sup>-ilvA-FRT, I-SceI<sup>CS</sup>-ydeO-FRT</i> | TB28 <i>I-SceI<sup>CS</sup>-ilvA</i> × P1. <i>I-SceI<sup>CS</sup>-ydeO</i> to Cm <sup>r</sup> , <i>cat</i> removed via pCP20 |
| <b>RNAP-PAmCherry</b>                       | MG1655 <i>rpoC-PAmCherry-FRT-kan-FRT</i>                               | Stracy et al., 2015                                                                                                          |
| <b>HU-PAmCherry</b>                         | MG1655 <i>hupB-PAmCherry-FRT-kan-FRT</i>                               | Stracy et al., 2015                                                                                                          |
| <b>HN-S-PAmCherry</b>                       | MG1655 <i>Hns-PAmCherry-FRT-kan-FRT</i>                                | Stracy et al., 2015                                                                                                          |
| <b>FIS-PAmCherry</b>                        | MG1655 <i>fis-PAmCherry-FRT-kan-FRT</i>                                | Uphoff et al., 2013                                                                                                          |
| <b>LacI-mCherry</b>                         | MG1655 <i>LacI-PAmCherry</i>                                           | Garza de Leon et al., 2017                                                                                                   |
| <b>PolI-PAmCherry</b>                       | MG1655 <i>polA-PAmCherry-FRT-kan-FRT</i>                               | Uphoff et al., 2013                                                                                                          |
| <b>LigA-PAmCherry</b>                       | MG1655 <i>ligA-PAmCherry-FRT-kan-FRT</i>                               | Uphoff et al., 2013                                                                                                          |
| <b>UvrA-PAmCherry</b>                       | MG1655 <i>uvrA-PAmCherry-FRT-kan-FRT</i>                               | Stracy et al., 2016                                                                                                          |
| <b>MutS-PAmCherry</b>                       | MG1655 <i>mutS-PAmCherry-FRT-kan-FRT</i>                               | Uphoff et al., 2016                                                                                                          |
| <b>TopoIV-PAmCherry</b>                     | MG1655 <i>parC-PAmCherry-FRT-kan-FRT</i>                               | Zawadzki et al., 2015                                                                                                        |
| <b>MukB-PAmCherry</b>                       | MG1655 <i>mukB-PAmCherry-FRT-kan-FRT</i>                               | Badrinarayanan et al., 2012                                                                                                  |
| <b>GyrA-PAmCherry</b>                       | MG1655 <i>gyrA-PAmCherry-FRT-kan-FRT</i>                               | Stracy et al., 2019                                                                                                          |
| <b><i>recA</i>- strain</b>                  | TB28 <i>recAT233C-Tet</i>                                              | Lesterlin et al., 2014                                                                                                       |
| <b>MinC-Ypet</b>                            | <i>minC-Ypet</i>                                                       | Bisicchia et al., 2013                                                                                                       |
| <b>OT RNAP-PAmCherry</b>                    | OT <i>rpoC-PAmCherry-FRT-kan-FRT</i>                                   | OT x P1. RNAP-PAmCherry to Km <sup>r</sup>                                                                                   |
| <b>OT PolI-PAmCherry</b>                    | OT <i>polA-PAmCherry-FRT-kan-FRT</i>                                   | OT x P1. PolI-PAmCherry to Km <sup>r</sup>                                                                                   |
| <b>OT LigA-PAmCherry</b>                    | OT <i>ligA-PAmCherry-FRT-kan-FRT</i>                                   | OT x P1. LigA-PAmCherry to Km <sup>r</sup>                                                                                   |
| <b>OT MukB-PAmCherry</b>                    | OT <i>mukB-PAmCherry-FRT-kan-FRT</i>                                   | OT x P1. MukB-PAmCherry to Km <sup>r</sup>                                                                                   |
| <b>OT LacI-PAmCherry</b>                    | OT / <i>p lacI-PAmCherry</i>                                           | Transformation of <i>p lacI-PAmCherry</i> into OT strain                                                                     |
| <b>OT LacI<sup>41</sup>-PAmCherry</b>       | OT / <i>p lacI<sup>41</sup>-PAmCherry</i>                              | Transformation of <i>p lacI<sup>41</sup>-PAmCherry</i> into OT strain                                                        |
| <b>OT Free PAmCherry</b>                    | OT pBAD\HisB PAmCherry1                                                | Transformation of pBAD\HisB PAmCherry1 into OT strain                                                                        |
| <b>OT FIS-PAmCherry</b>                     | OT <i>fis-PAmCherry-FRT-kan-FRT</i>                                    | OT x P1. FIS-PAmCherry to Km <sup>r</sup>                                                                                    |
| <b>OT <i>recA</i>-</b>                      | OT <i>recAT233C-Tet</i>                                                | OT x P1. <i>recAT233C-Tet</i> to                                                                                             |

|                                                       |                                                                             |                                                                             |
|-------------------------------------------------------|-----------------------------------------------------------------------------|-----------------------------------------------------------------------------|
| <b>OT RNAP-PAmCherry</b><br><i>recA-</i>              | OT <i>rpoC-PAmCherry-FRT-kan-FRT</i>                                        | Tc<br>OT RNAP-PAmCherry x P1.<br><i>recAT233C-Tet</i> to Tc                 |
| <b>OT PolI-PAmCherry</b><br><i>recA-</i>              | OT <i>polA-PAmCherry-FRT-kan-FRT</i>                                        | OT PolI-PAmCherry x P1.<br><i>recAT233C-Tet</i> to Tc                       |
| <b>OT LigA-PAmCherry</b><br><i>recA-</i>              | OT <i>ligA-PAmCherry-FRT-kan-FRT</i>                                        | OT LigA-PAmCherry x P1.<br><i>recAT233C-Tet</i> to Tc                       |
| <b>OT MukB-PAmCherry</b><br><i>recA-</i>              | OT <i>mukB-PAmCherry-FRT-kan-FRT</i>                                        | OT MukB-PAmCherry x P1.<br><i>recAT233C-Tet</i> to Tc to Km <sup>r</sup>    |
| <b>OT LacI-PAmCherry</b><br><i>recA-</i>              | OT / <i>P lacI-PAmCherry</i>                                                | Transformation of <i>P lacI-PAmCherry</i> into OT <i>recA-</i>              |
| <b>OT LacI<sup>41</sup>-PAmCherry</b><br><i>recA-</i> | OT / <i>P lacI<sup>41</sup>-PAmCherry</i>                                   | Transformation of <i>P lacI<sup>41</sup>-PAmCherry</i> into OT <i>recA-</i> |
| <b>OT Free PA-mCherry</b><br><i>recA-</i>             | OT pBAD\HisB PAmCherry1                                                     | Transformation of pBAD\HisB PAmCherry1 into OT <i>recA-</i> strain          |
| <hr/> <b>Plasmids</b> <hr/>                           |                                                                             |                                                                             |
| <b>p <i>lacI-PAmCherry</i></b>                        | LacI-PAmCherry producing plasmid                                            | Garza de Leon et al., 2017                                                  |
| <b>p <i>lacI<sup>41</sup>-PAmCherry</i></b>           | LacI <sup>41</sup> -PAmCherry producing plasmid                             | Garza de Leon et al., 2017                                                  |
| <b>pBAD\HisB PAmCherry1</b>                           | PAmCherry1 producing plasmid                                                | Endesfelder et al., 2013                                                    |
| <b>pCP20</b>                                          | Flp expression plasmid                                                      | Datsenko et al., 2000                                                       |
| <b>pParBmCherry (pSN70)</b>                           | IPTG inducible expression of N-terminal fusion mCherry-ParB <sub>PMT1</sub> | Nolivos et al., 2019                                                        |
| <b>pI-SceI (pSN1)</b>                                 | Arabinose inducible expression of I-SceI endonuclease                       | Gift from Sophie Nolivos                                                    |
